# Supplementary material for: Rule breaker boron clusters: a new class of hypoelectronic osmaborane clusters [(Cp*Os)2BnHn] (n = 6–10)
Source: Royal Society of Chemistry journal article supplement (doi:10.1039/d3sc06464f), 2024-01-01
Supplement: d3sc06464f1.pdf [file d3sc06464f1.pdf]

**SUPPORTING INFORMATION**

**Rule Breaker Boron Clusters: A New Class of Hypoelectronic Osmaborane Clusters  $[(\text{Cp}^*\text{Os})_2\text{B}_n\text{H}_n]$  ( $n = 6-10$ )**

*Ketaki Kar, Sourav Kar and Sundargopal Ghosh\**

*Department of Chemistry, Indian Institute of Technology Madras, Chennai 600036, India. Tel: +91 44-22574230; E-mail: [sghosh@iitm.ac.in](mailto:sghosh@iitm.ac.in)*

## Table of contents

### I Experimental Details

#### I.1 Supplementary Data

Figure S1 Molecular structure and labeling diagram of **1**.

Figure S2 Molecular structure and labeling diagram of **2**.

Figure S3 Molecular structure and labeling diagram of **3**.

Figure S4 Molecular structure and labeling diagram of **4**.

Figure S5 Molecular structure and labeling diagram of **5**.

#### I.2 Spectroscopic Details

Figure S6 ESI-MS spectrum of **1**.

Figure S7  $^1\text{H}$  NMR spectrum of **1** in  $\text{CDCl}_3$ .

Figure S8 Stacked  $^1\text{H}$  (blue) and  $^1\text{H}\{^{11}\text{B}\}$  (red) NMR spectra of **1** in  $\text{CDCl}_3$ .

Figure S9  $^{11}\text{B}\{^1\text{H}\}$  NMR spectrum of **1** in  $\text{CDCl}_3$ .

Figure S10  $^{13}\text{C}\{^1\text{H}\}$  NMR spectrum of **1** in  $\text{CDCl}_3$ .

Figure S11 IR spectrum of **1**.

Figure S12 ESI-MS spectrum of **2**

Figure S13  $^1\text{H}$  NMR spectrum of **2** in  $\text{CDCl}_3$ .

Figure S14 Stacked  $^1\text{H}$  (blue) and  $^1\text{H}\{^{11}\text{B}\}$  (red) NMR spectra of **2** in  $\text{CDCl}_3$ .

Figure S15  $^{11}\text{B}\{^1\text{H}\}$  NMR spectrum of **2** in  $\text{CDCl}_3$ .

Figure S16  $^{13}\text{C}\{^1\text{H}\}$  NMR spectrum of **2** in  $\text{CDCl}_3$ .

Figure S17 IR spectrum of **2**.

Figure S18 ESI-MS spectrum of **3**

Figure S19  $^1\text{H}$  NMR spectrum of **3** in  $\text{CDCl}_3$ .

Figure S20  $^{11}\text{B}\{^1\text{H}\}$  NMR spectrum of **3** in  $\text{CDCl}_3$ .

Figure S21  $^{13}\text{C}\{^1\text{H}\}$  NMR spectrum of **3** in  $\text{CDCl}_3$ .

Figure S22 IR spectrum of **3**

Figure S23 ESI-MS spectrum of **4**

Figure S24  $^1\text{H}$  NMR spectrum of **4** in  $\text{CDCl}_3$ .

Figure S25 Stacked  $^1\text{H}$  (blue) and  $^1\text{H}\{^{11}\text{B}\}$  (red) NMR spectra of **4** in  $\text{CDCl}_3$ .

Figure S26  $^{11}\text{B}\{^1\text{H}\}$  NMR spectrum of **4** in  $\text{CDCl}_3$ .

- Figure S27  $^{13}\text{C}\{^1\text{H}\}$  NMR spectrum of **4** in  $\text{CDCl}_3$ .
- Figure S28 IR spectrum of **4**.
- Figure S29 ESI-MS spectrum of **5**
- Figure S30  $^1\text{H}$  NMR spectrum of **5** in  $\text{CDCl}_3$ .
- Figure S31  $^{11}\text{B}\{^1\text{H}\}$  NMR spectrum of **5** in  $\text{CDCl}_3$ .
- Figure S32  $^{13}\text{C}\{^1\text{H}\}$  NMR spectrum of **5** in  $\text{CDCl}_3$ .
- Figure S33 IR spectrum of **5**.
- Figure S34 UV-Vis spectra of **1-5**.

### I.3 X-ray Analysis Details

### II Computational Details

- Table S1 Bond parameters of clusters **1-5** are compared with their optimized values and WBIs.
- Figure S35 Selected molecular orbitals of cluster **1**.
- Figure S36 Selected molecular orbitals of cluster **2**.
- Figure S37 Selected molecular orbitals of cluster **3**.
- Figure S38 Selected molecular orbitals of cluster **4**.
- Figure S39 Selected molecular orbitals of cluster **5**.
- Table S2 Calculated natural charges ( $q_{\text{Os}}$ , and  $q_{\text{B}}$ ), natural valence populations ( $\text{Pop}$ ) and HOMO–LUMO gaps ( $\Delta E_{\text{H-L}}$ ) of clusters **1-5**.
- Figure S40 Calculated absorption spectrum of **1**.
- Table S3 TD-DFT calculated electronic transition configuration for **1** along with their corresponding excitation energies, wavelength and oscillator strengths.
- Figure S41 Calculated absorption spectrum of **2**.
- Table S4 TD-DFT calculated electronic transition configuration for **2** along with their corresponding excitation energies, wavelength and oscillator strengths.
- Figure S42 Calculated absorption spectrum of **3**.
- Table S5 TD-DFT calculated electronic transition configuration for **3** along with their corresponding excitation energies, wavelength and oscillator strengths.
- Figure S43 Calculated absorption spectrum of **4**.
- Table S6 TD-DFT calculated electronic transition configuration for **4** along with their corresponding excitation energies, wavelength and oscillator strengths.

Figure S44 Calculated absorption spectrum of **5**.

Table S7 TD-DFT calculated electronic transition configuration for **5** along with their corresponding excitation energies, wavelength and oscillator strengths.

### **III Cartesian Coordinates of all Optimized Structures**

Figure S45 Optimized geometry of **1**.

Figure S46 Optimized geometry of **2**.

Figure S47 Optimized geometry of **3**.

Figure S48 Optimized geometry of **4**.

Figure S49 Optimized geometry of **5**.

### **IV References**

## I Experimental Details

### General Procedures and Instrumentation

All the manipulations were conducted under an Ar atmosphere using standard Schlenk line techniques or in a glove box. Solvents were distilled prior to use under an Ar atmosphere.  $\text{LiBH}_4$  (2.0 M in THF) and  $[\text{BH}_3\cdot\text{SMe}_2]$  were used as received (Sigma Aldrich).  $[\text{Cp}^*\text{OsBr}_2]_2$ <sup>1</sup> was synthesized according to the literature method. Thin layer chromatography was carried out on 250- $\mu\text{m}$  diameter aluminum- supported silica gel TLC plates (MERCK TLC Plates) to separate the reaction mixtures. NMR spectra were recorded by using 400 and 500 MHz Bruker FT-NMR spectrometers. The residual solvent protons were used as reference ( $\text{CDCl}_3$ ,  $\delta = 7.26$  ppm; Benzene- $d_6$ ,  $\delta = 7.16$  ppm). The inverse-gated decoupling (zgig) and power-gated (zgpr) pulse sequences, respectively, were used to get the  $^{11}\text{B}\{^1\text{H}\}$  and  $^1\text{H}\{^{11}\text{B}\}$  spectra.  $^1\text{H}$  decoupled  $^{11}\text{B}$  spectra were processed with a backward linear prediction algorithm to remove the broad  $^{11}\text{B}$  background signal of the NMR probe and NMR tube<sup>2</sup>. The mass spectra were recorded on a Bruker MicroTOF-II Qtof and 6545 Qtof LC/MS instruments. The IR spectra were recorded on a JASCO 400 FT-IR spectrometer. UV-vis absorption spectra were recorded on a Thermo Scientific (Evolution 300) UV-vis spectrometer.

**Synthesis of  $[(\text{Cp}^*\text{Os})_2\text{B}_6\text{H}_6]$  (**1**):** Under an Ar atmosphere, in a flame-dried Schlenk tube  $[\text{Cp}^*\text{OsBr}_2]_2$  (0.1 g, 0.102 mmol) was suspended in xylene (15 mL) and cooled to  $-78^\circ\text{C}$ .  $[\text{LiBH}_4\cdot\text{THF}]$  (0.2 mL, 0.400 mmol) was added, and the reaction mixture was allowed to warm slowly to room temperature and kept stirring for another 45 mins.  $[\text{BH}_3\cdot\text{THF}]$  (1 mL) was added to the reaction mixture, and the resultant mixture was slowly warmed to room temperature, allowed to stir for additional 30 min, and kept for thermolysis at  $110^\circ\text{C}$  for 16 h. The solvent was then removed under vacuum, and the residue was dissolved in hexane/ $\text{CH}_2\text{Cl}_2$  mixture (80:20) and passed via celite. The solvent was again evaporated under vacuum, and the residue was purified using silica-gel TLC plates by eluting with hexane/ $\text{CH}_2\text{Cl}_2$  (80:20) mixture that yielded colourless solid **1** (0.013g, 18%).

**1:** MS (ESI<sup>+</sup>):  $m/z$  calculated for  $[\text{C}_{20}\text{H}_{36}\text{B}_6\text{Os}_2 + \text{Na}]^+$ : 745.2505, found: 745.2463;  $^1\text{H}$  NMR (500 MHz,  $\text{CDCl}_3$ ,  $22^\circ\text{C}$ ):  $\delta = 9.92$  (q, 2H, B- $H_t$ ), 8.97 (br, 2H, B- $H_t$ ),  $-2.31$  (q, 2H, B- $H_t$ ), 2.03 (s, 30H,  $2\times\text{Cp}^*$ );  $^1\text{H}\{^{11}\text{B}\}$  NMR (500 MHz,  $\text{CDCl}_3$ ,  $22^\circ\text{C}$ ):  $\delta$  (ppm) = 9.92 (q, 2H, B- $H_t$ ), 8.97 (br, 2H, B- $H_t$ )  $-2.31$  (s, 2H, B- $H_t$ );  $^{11}\text{B}\{^1\text{H}\}$  NMR (160 MHz,  $\text{CDCl}_3$ ,  $22^\circ\text{C}$ ):  $\delta$  (ppm) = 97.4 (s, 2B), 61.3 (s, 2B), -

16.3 (s, 2B);  $^{13}\text{C}\{^1\text{H}\}$  NMR (125 MHz,  $\text{CDCl}_3$ , 22 °C):  $\delta$  (ppm) = 95.8 ( $\text{C}_5\text{Me}_5$ ), 11.2 ( $\text{C}_5\text{Me}_5$ ); IR (dichloromethane,  $\text{cm}^{-1}$ ):  $\bar{\nu}$  = 2530 (B- $H_t$ ), 2500 (B- $H_t$ ).

**Synthesis of  $[(\text{Cp}^*\text{Os})_2\text{B}_7\text{H}_7]$  (2),  $[(\text{Cp}^*\text{Os})_2\text{B}_8\text{H}_8]$  (3) and  $[(\text{Cp}^*\text{Os})_2\text{B}_9\text{H}_9]$  (4):** Under an Ar atmosphere, in a moisture-free Schlenk tube,  $[\text{Cp}^*\text{OsBr}_2]_2$  (0.1 g, 0.102 mmol) was suspended in 15 mL toluene and cooled to  $-78^\circ\text{C}$ .  $[\text{LiBH}_4\cdot\text{THF}]$  (0.2 mL, 0.400 mmol) was added dropwise, and the reaction mixture was allowed to warm slowly to room temperature and kept stirring for another 45 mins.  $[\text{BH}_3\cdot\text{SMe}_2]$  (1 mL) was added to the reaction mixture, and the resultant mixture was slowly warmed to room temperature, allowed to stir for additional 30 min, and kept for thermolysis at  $90^\circ\text{C}$  for 17 h. The solvent was then removed under vacuum, and the residue was dissolved in hexane/ $\text{CH}_2\text{Cl}_2$  mixture (60:40) and passed via celite. The solvent was again evaporated under vacuum, and the residue was purified using silica-gel TLC plates by eluting with hexane/ $\text{CH}_2\text{Cl}_2$  (60:40) mixture that yielded dark green solid **2** (0.009g, 12%), orange solid **3** (0.005g, 7%), violet solid **4** (0.008g, 10%) compounds.

**2:** MS (ESI<sup>+</sup>):  $m/z$  calculated for  $[\text{C}_{20}\text{H}_{37}\text{B}_7\text{Os}_2 + \text{H}]^+$ : 735.2865, found: 735.2891;  $^1\text{H}$  NMR (500 MHz,  $\text{CDCl}_3$ , 22 °C):  $\delta$  = 10.71 (br, 1H, B- $H_t$ ), 8.70 (q, 4H, B- $H_t$ ), 1.96 (s, 30H,  $2\times\text{Cp}^*$ );  $^1\text{H}\{^{11}\text{B}\}$  NMR (500 MHz,  $\text{CDCl}_3$ , 22 °C):  $\delta$  (ppm) = 10.71 (br, 1H, B- $H_t$ ), 8.70 (q, 4H, B- $H_t$ ), 0.17 (br, 2H, B- $H_t$ ), 1.96 (s, 30H,  $2\times\text{Cp}^*$ );  $^{11}\text{B}\{^1\text{H}\}$  NMR (160 MHz,  $\text{CDCl}_3$ , 22 °C):  $\delta$  (ppm) = 107.7 (s, 1B), 77.7 (s, 1B), 61.2 (s, 2B), 56.0 (s, 2B), 6.2 (s, 1B);  $^{13}\text{C}\{^1\text{H}\}$  NMR (125 MHz,  $\text{CDCl}_3$ , 22 °C):  $\delta$  (ppm) = 96.3 ( $\text{C}_5\text{Me}_5$ ), 10.8 ( $\text{C}_5\text{Me}_5$ ); IR (dichloromethane,  $\text{cm}^{-1}$ ):  $\bar{\nu}$  = 2500 (B- $H_t$ ), 2440 (B- $H_t$ ).

**3:** MS (ESI<sup>+</sup>):  $m/z$  calculated for  $[\text{C}_{20}\text{H}_{38}\text{B}_8\text{Os}_2 + \text{K}]^+$ : 784.2600, found: 784.3152;  $^1\text{H}$  NMR (500 MHz,  $\text{CDCl}_3$ , 22 °C):  $\delta$  = 11.29 (q, B- $H_t$ ), 9.09 (q, B- $H_t$ ), 6.54 (br, B- $H_t$ ), 1.97 (s, 15H;  $1\times\text{Cp}^*$ ), 1.79 (s, 15H;  $1\times\text{Cp}^*$ );  $^{11}\text{B}\{^1\text{H}\}$  NMR (160 MHz,  $\text{CDCl}_3$ , 22 °C):  $\delta$  (ppm) = 89.3 (br, 1B), 79.5 (br, 1B), 78.8 (br, 1B), 22.1 (br, 1B), 20.8 (br, 1B), 14.0 (br, 1B), -12.3 (br, 1B), -13.0 (br, 1B);  $^{13}\text{C}\{^1\text{H}\}$  NMR (125 MHz,  $\text{CDCl}_3$ , 22 °C):  $\delta$  (ppm) = 99.1, 97.5 ( $\text{C}_5\text{Me}_5$ ), 10.3, 9.5 ( $\text{C}_5\text{Me}_5$ ); IR (dichloromethane,  $\text{cm}^{-1}$ ):  $\bar{\nu}$  = 2518 (B- $H_t$ ), 2475 (B- $H_t$ ).

**4:** MS (ESI<sup>+</sup>):  $m/z$  calculated for  $[\text{C}_{20}\text{H}_{39}\text{B}_9\text{Os}_2 + \text{CH}_3\text{OH}]^+$ : 789.3408, found: 789.3471;  $^1\text{H}$  NMR (500 MHz,  $\text{CDCl}_3$ , 22 °C):  $\delta$  = 11.76 (br, B- $H_t$ ), 9.69 (pcq, B- $H_t$ ), 5.03 (q, B- $H_t$ ), 3.95 (br, B- $H_t$ ), 1.84 (s, 15H,  $1\times\text{Cp}^*$ ), 1.82 (s, 15H,  $1\times\text{Cp}^*$ );  $^1\text{H}\{^{11}\text{B}\}$  NMR (500 MHz,  $\text{CDCl}_3$ , 22 °C):  $\delta$  (ppm) = 11.76 (br, 2H, B- $H_t$ ), 9.69 (br, 2H, B- $H_t$ ), 5.03 (br, 1H, B- $H_t$ ), 4.95 (br, 1H, B- $H_t$ ), 3.81 (br, 1H, B- $H_t$ ), 3.56 (br, 1H, B- $H_t$ ), 3.15 (br, 1H, B- $H_t$ );  $^{11}\text{B}\{^1\text{H}\}$  NMR (160 MHz,  $\text{CDCl}_3$ , 22 °C):  $\delta$  (ppm) =

95.9 (br, 1B), 79.4 (br, 1B), 23.9 (br, 1B), 18.3 (br, 1B), 11.6 (br, 1B), 8.7 (br, 1B), 6.0 (br, 1B), 3.8 (br, 1B), 2.4 (br, 1B);  $^{13}\text{C}\{^1\text{H}\}$  NMR (125 MHz,  $\text{CDCl}_3$ , 22 °C):  $\delta$  (ppm) = 95.7, 94.0 ( $\text{C}_5\text{Me}_5$ ), 10.3, 10.2 ( $\text{C}_5\text{Me}_5$ ); IR (dichloromethane,  $\text{cm}^{-1}$ ):  $\bar{\nu}$  = 2526 (B- $H_t$ ), 2492 (B- $H_t$ ).

**Synthesis of [(Cp\*Os) $_2$ B $_{10}$ H $_{10}$ ] (5):** Under an Ar atmosphere, in a moisture-free Schlenk tube,  $[\text{Cp}^*\text{OsBr}_2]_2$  (0.1 g, 0.102 mmol) was suspended in 15 mL toluene and cooled to -78°C.  $[\text{LiBH}_4\cdot\text{THF}]$  (0.2 mL, 0.400 mmol) was added dropwise, and the reaction mixture was allowed to warm slowly to room temperature and kept stirring for another 45 mins.  $[\text{BH}_3\cdot\text{SMe}_2]$  (1 mL) was added to the reaction mixture, and the resultant mixture was slowly warmed to room temperature, allowed to stir for additional 30 min, and kept for reflux at 110 °C for 17 h. The solvent was then removed under vacuum, and the residue was dissolved in hexane/ $\text{CH}_2\text{Cl}_2$  mixture (50:50) and passed via celite. The solvent was again evaporated under vacuum, and the residue was purified using silica-gel TLC plates by eluting with hexane/ $\text{CH}_2\text{Cl}_2$  (50:50) mixture that yielded green solid **5** (0.004g, 5%) along with compounds **2-4** in low yields.

**5:** MS (ESI $^+$ ):  $m/z$  calculated for  $[\text{C}_{20}\text{H}_{40}\text{B}_{10}\text{Os}_2 + \text{H}]^+$ : 770.3404, found: 770.3433;  $^1\text{H}$  NMR (500 MHz,  $\text{CDCl}_3$ , 22 °C):  $\delta$  (ppm) = 10.74 (br, 2H, B- $H_t$ ), 9.53 (pcq, 8H, B- $H_t$ ), 1.93 (s, 30H, 1 $\times$ Cp\*);  $^{11}\text{B}\{^1\text{H}\}$  NMR (160 MHz,  $\text{CDCl}_3$ , 22 °C):  $\delta$  (ppm) = 43.9 (br, 2B), 16.1 (br, 2B), 4.6 (br, 4B), -8.7 (br, 4B);  $^{13}\text{C}\{^1\text{H}\}$  NMR (125 MHz,  $\text{CDCl}_3$ , 22 °C):  $\delta$  (ppm) = 98.8 ( $\text{C}_5\text{Me}_5$ ), 9.1 ( $\text{C}_5\text{Me}_5$ ); IR (dichloromethane,  $\text{cm}^{-1}$ ):  $\bar{\nu}$  = 2492 (B- $H_t$ ), 2440 (B- $H_t$ ).

## I.1 Supplementary Data

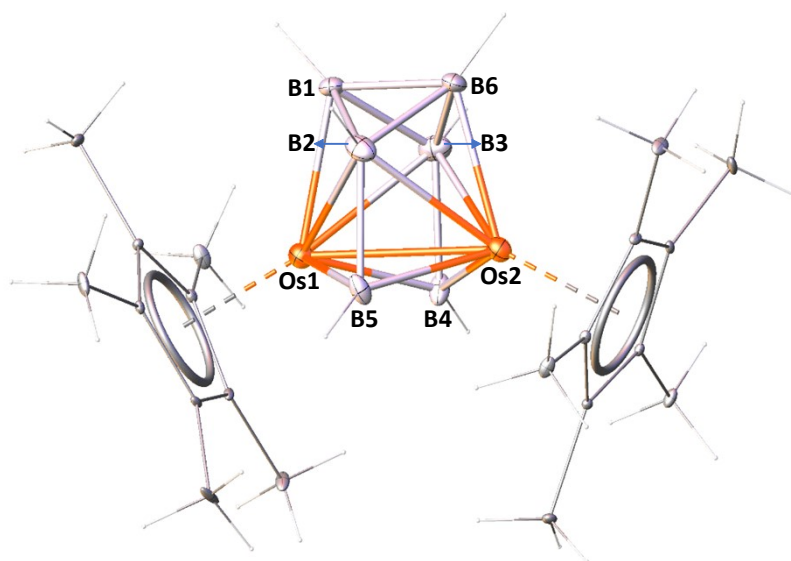

**Figure S1.** Molecular structure and labelling diagram of  $[(\text{Cp}^*\text{Os})_2\text{B}_6\text{H}_6]$  (**1**). Selected bond lengths [ $\text{\AA}$ ] and angles (deg) of **1**: Os1-Os2 2.7688(3), Os1-B4 2.055(8), Os1-B5 2.060(7), Os2-B4 2.062(7), Os2-B5 2.084(8), Os1-B1 2.134(8), Os2-B6 2.234(11); B4-Os1-Os2 47.9(2), B5-Os1-Os2 48.5(2), Os1-B4-Os2 84.5(3), Os1-B5-Os2 83.8(3), B5-Os2-Os1 47.7(2).

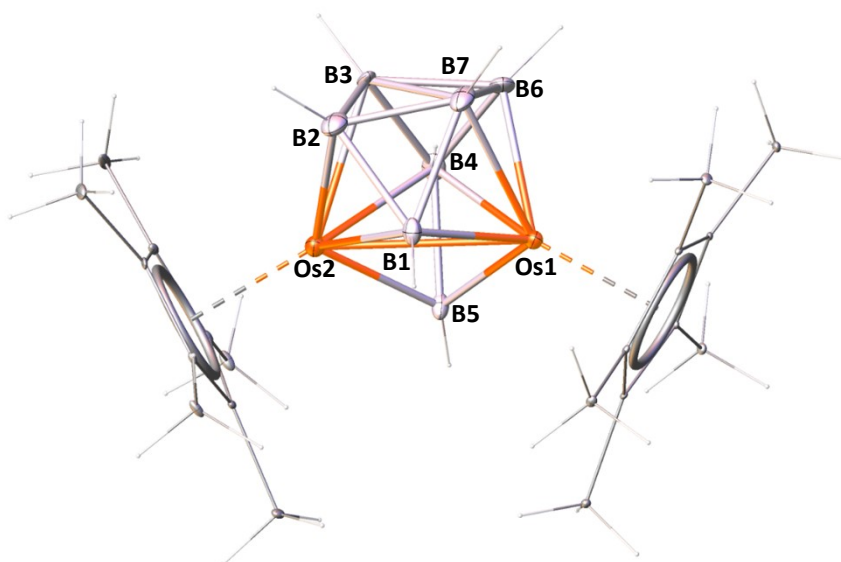

**Figure S2.** Molecular structure and labelling diagram of  $[(\text{Cp}^*\text{Os})_2\text{B}_7\text{H}_7]$  (**2**). Selected bond lengths [ $\text{\AA}$ ] and angles (deg) of **2**: B1-Os1 2.081(12), B1-Os2 2.180(11), B5-Os1 2.030(11), B5-Os2 2.040(12), B2-Os2 2.121(15), B6-Os1 2.091(13), B4-Os2 2.179(13), B4-Os1 2.236(14), B3-Os2 2.222(12), B7-Os1 2.246(13), Os2-Os1 2.805; B5-Os1-B1 93.2(5), B1-Os1-Os2 50.4(3), B5-Os1-Os2 46.6(3), B5-Os2-B1 90.1(4), B5-Os2-Os1 46.3(3), Os1-B1-Os2 82.3(4).



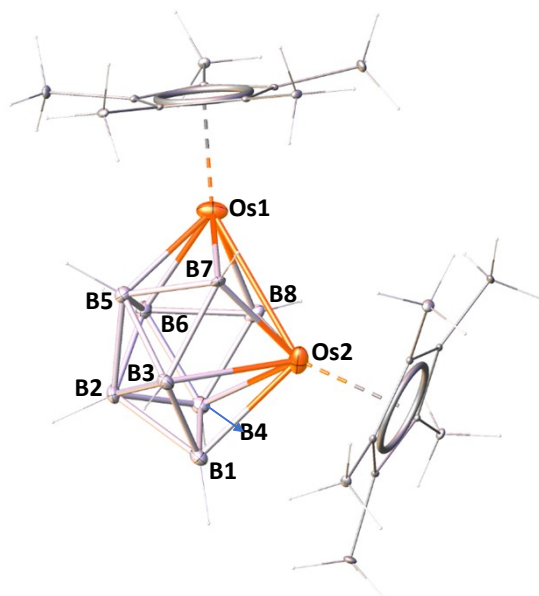

**Figure S3.** Molecular structure and labelling diagram of  $[(\text{Cp}^*\text{Os})_2\text{B}_8\text{H}_8]$  (**3**). Selected bond lengths [ $\text{\AA}$ ] and angles (deg) of **3**: Os1-Os2 2.905, Os1-B8 2.13(3), Os1-B7 2.22(4), Os2-B7 2.16(3), Os2-B8 2.14(3), Os2-B1 2.28(3), Os1-B5 2.14(4), B2-B5 1.78(5); B8-Os1-B7 91.6(12), B8-Os2-B7 93.0(13), Os2-B7-Os1 83.1(14), B7-Os2-B1 92.9(14), B8-Os1-B5 85.0(14).

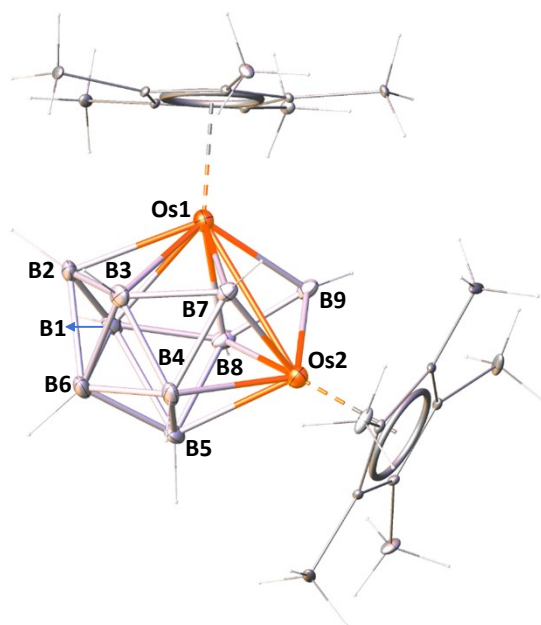

**Figure S4.** Molecular structure and labelling diagram of  $[(\text{Cp}^*\text{Os})_2\text{B}_9\text{H}_9]$  (**4**). Selected bond lengths [ $\text{\AA}$ ] and angles (deg) of **4**: Os1-B7 2.159(17), Os1-B9 2.175(17), Os2-B9 2.051(18), Os2-B7 2.138(17), Os1-B8 2.210(19), Os2-B8 2.13(2), Os1-B2 2.229(18), Os2-B5 2.212(19), B2-B6 1.82(3); B7-Os1-B9 91.4(7); B9-Os1-B8 40.4(8), B9-Os2-B7 95.5(7), B7-Os1-Os2 48.1(5), B9-Os1-Os2 45.8(5), B9-Os2-Os1 49.4(5).

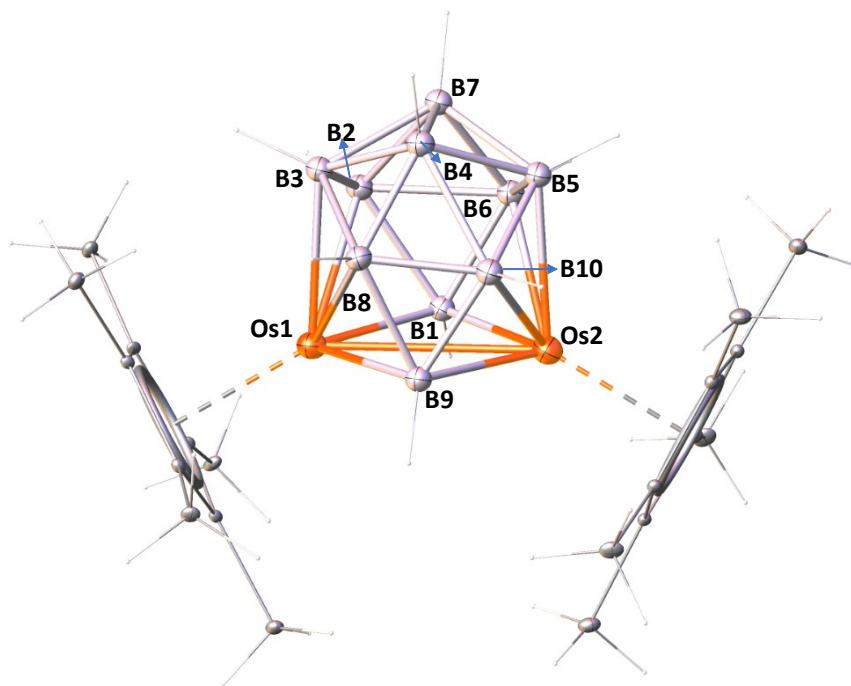

**Figure S5.** Molecular structure and labelling diagram of  $[(\text{Cp}^*\text{Os})_2\text{B}_{10}\text{H}_{10}]$  (**5**). Selected bond lengths [ $\text{\AA}$ ] and angles (deg) of **5**: Os1-Os2 2.832(2), B1-Os1 2.14(4), B2-Os1 2.20(4), B9-Os1 2.19(4), B9-Os2 2.16(4), B3-Os1 2.22(4), B5-Os2 2.20(4), B2-Os1 2.20(4), B6-Os2 2.24(4), B8-B10 1.58(5), B2-B6 1.79(6); Os2-B9-Os1 81.3(15), B9-Os2-Os1 49.9(11), B1-Os2-Os1 48.6(10), B1-Os2-B6 45.3(14), B10-Os2-B5 47.6(15), B8-Os1-Os2 73.1(9), B1-Os2-B9 98.4(15).

## I.2 Spectroscopic details

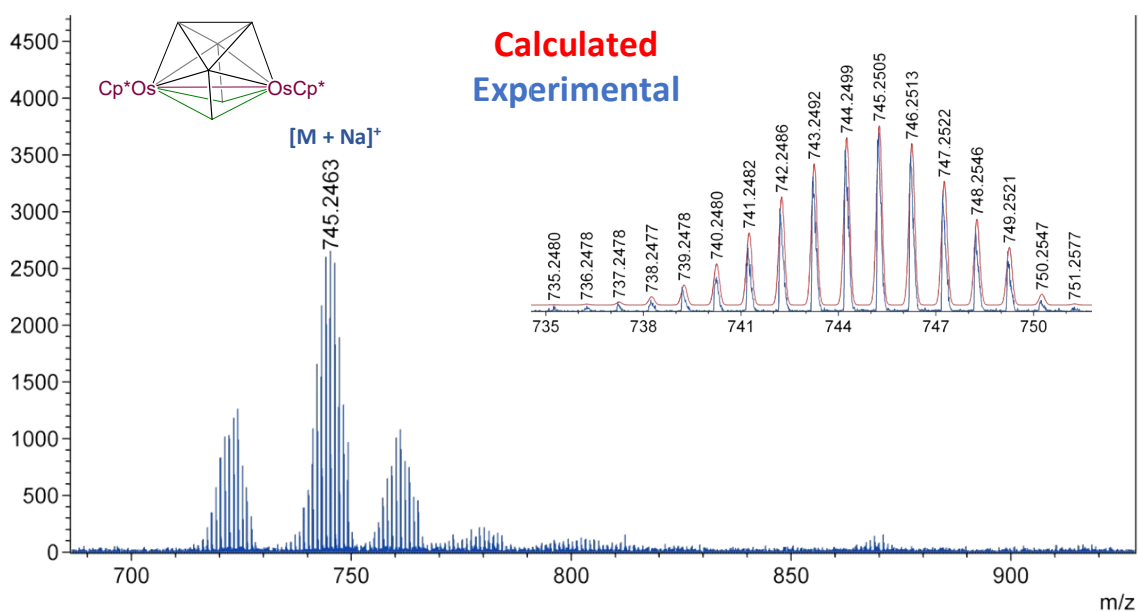

**Figure S6.** ESI-MS spectrum of **1**.

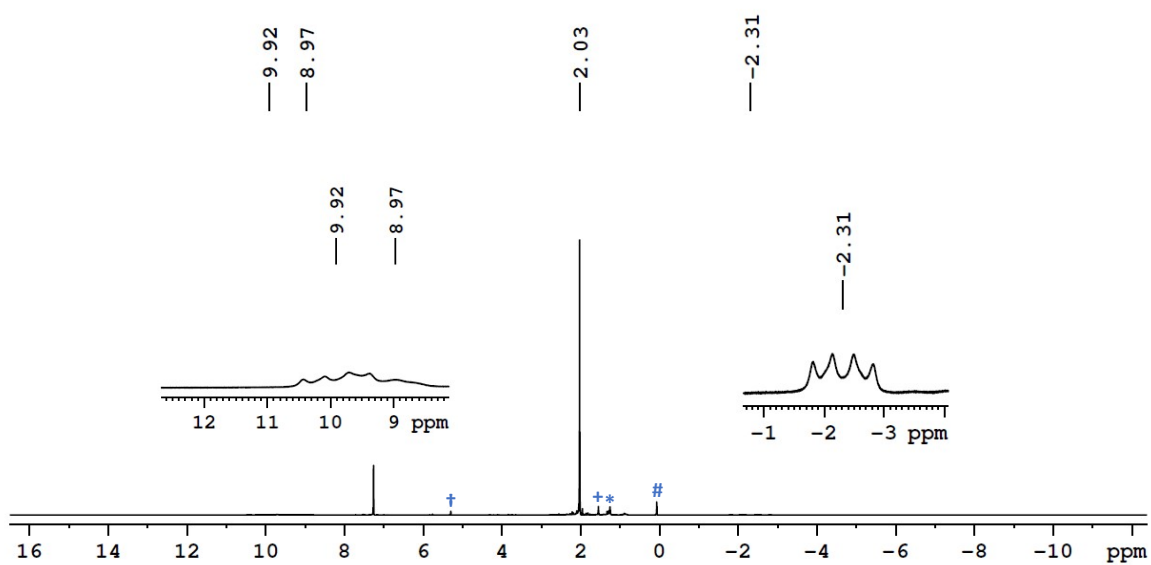

**Figure S7.**  $^1\text{H}$  NMR spectrum of **1** in  $\text{CDCl}_3$ . (#Silicon grease, † $\text{CH}_2\text{Cl}_2$ , ‡ $\text{H}_2\text{O}$ , \*Hexane)

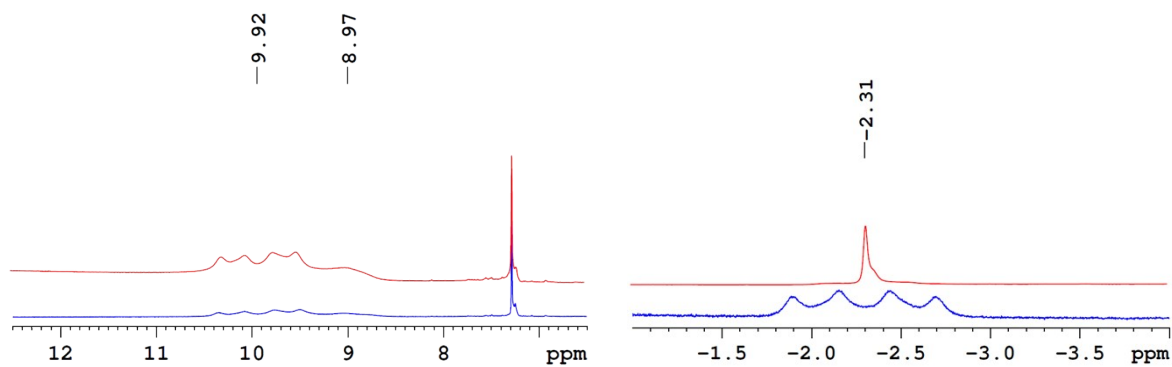

**Figure S8.** Stacked  $^1\text{H}$  (blue) and  $^1\text{H}\{^{11}\text{B}\}$  (red) NMR spectra of **1** in  $\text{CDCl}_3$ .

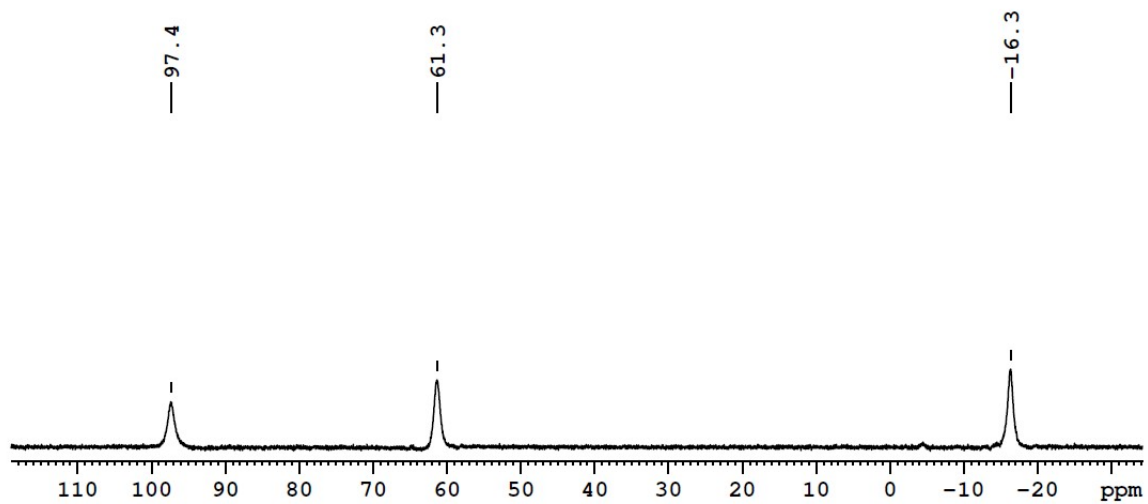

**Figure S9.**  $^{11}\text{B}\{^1\text{H}\}$  NMR spectrum of **1** in  $\text{CDCl}_3$ .

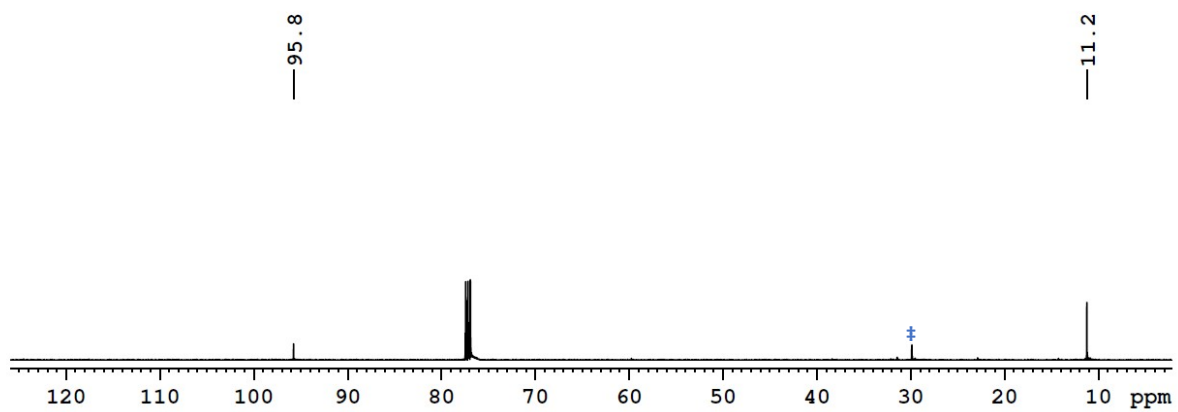

**Figure S10.**  $^{13}\text{C}\{^1\text{H}\}$  NMR spectrum of **1** in  $\text{CDCl}_3$ . (\*H-Grease)

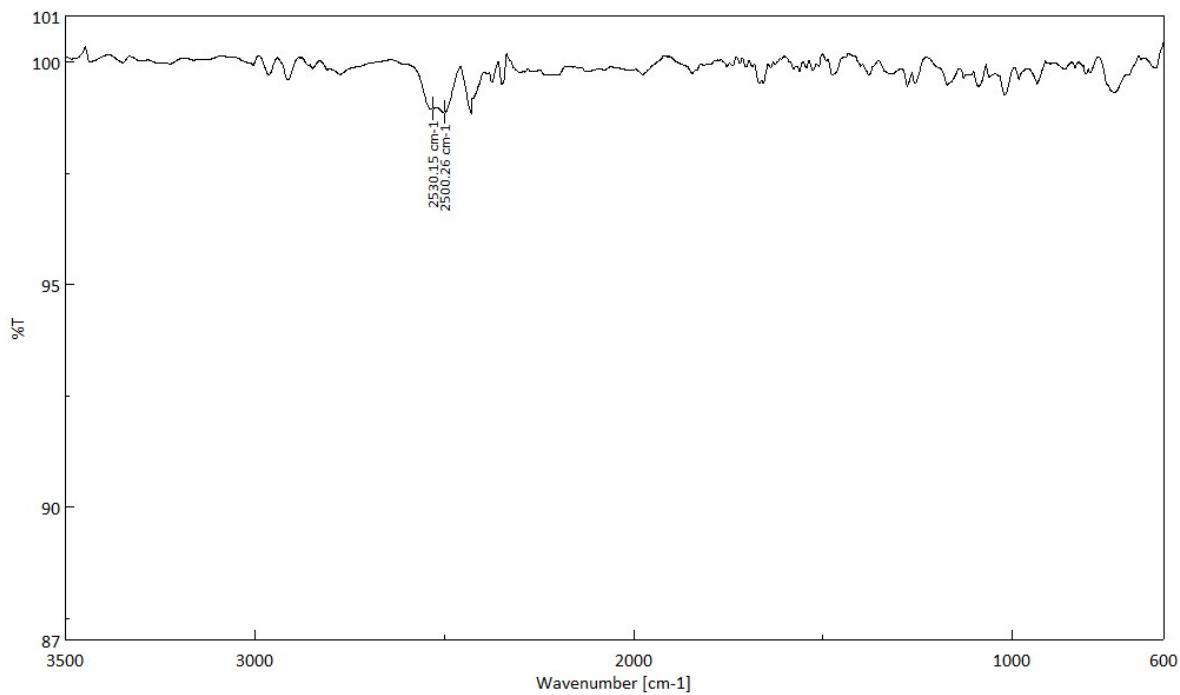

Figure S11. IR spectrum of **1** in CH<sub>2</sub>Cl<sub>2</sub>.

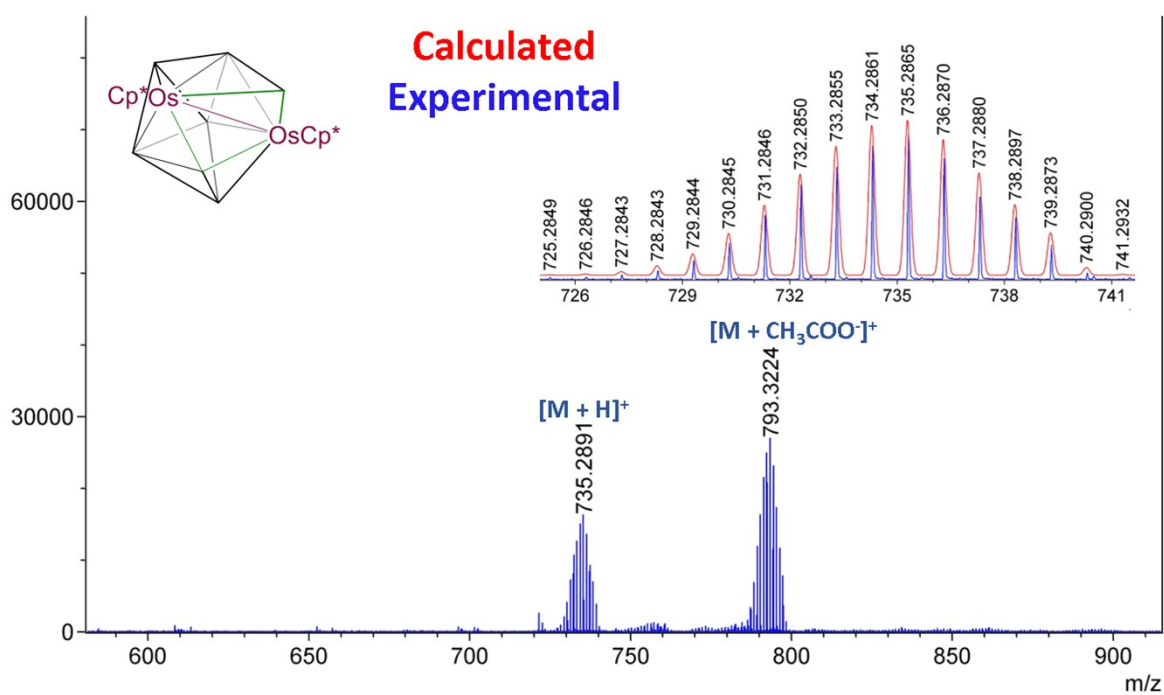

Figure S12. ESI-MS spectrum of **2**.

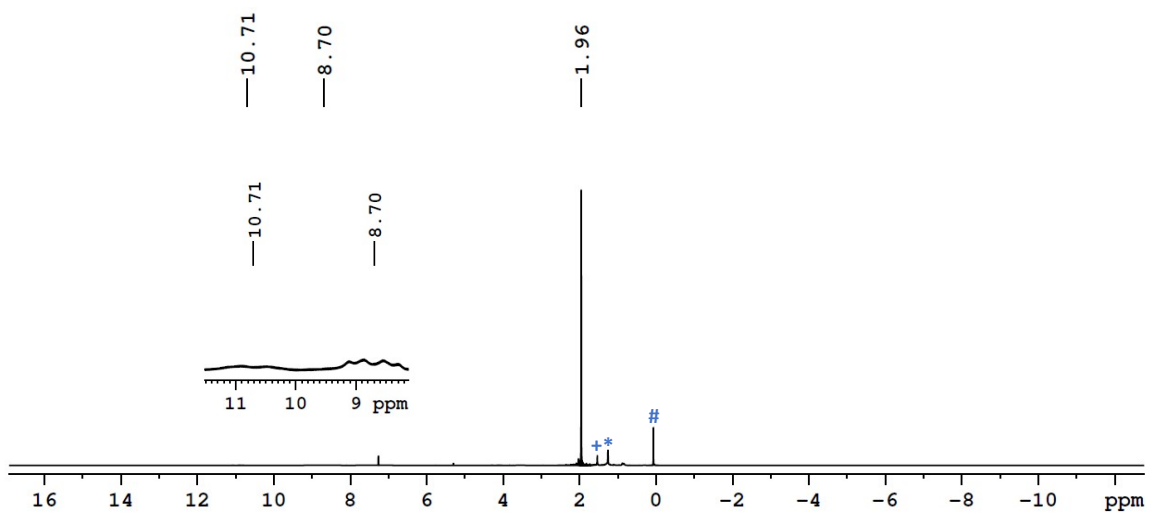

**Figure S13.**  $^1\text{H}$  NMR spectrum of **2** in  $\text{CDCl}_3$ . (#Silicon grease, + $\text{H}_2\text{O}$ , \*Hexane)

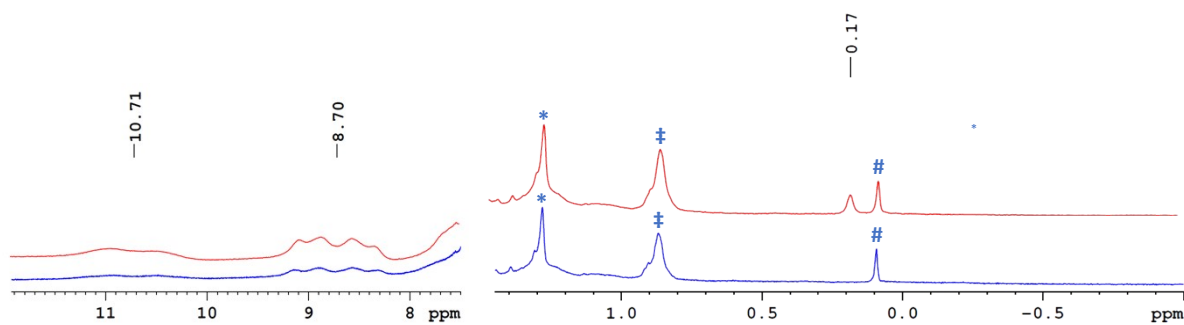

**Figure S14.** Stacked  $^1\text{H}$  (blue) and  $^1\text{H}\{^{11}\text{B}\}$  (red) NMR spectra of **2** in  $\text{CDCl}_3$ . (#Silicon grease, +H-Grease, \*Hexane)

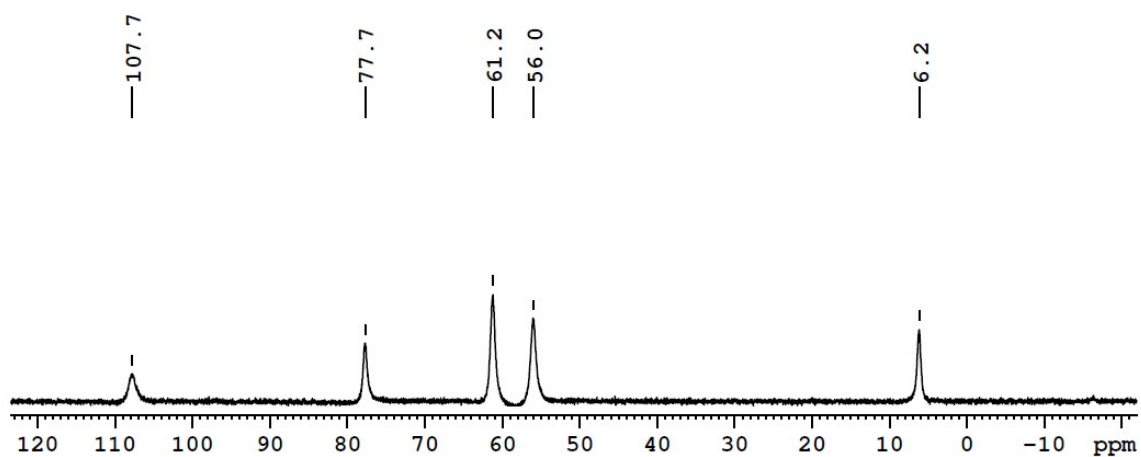

**Figure S15.**  $^{11}\text{B}\{^1\text{H}\}$  NMR spectrum of **2** in  $\text{CDCl}_3$ .

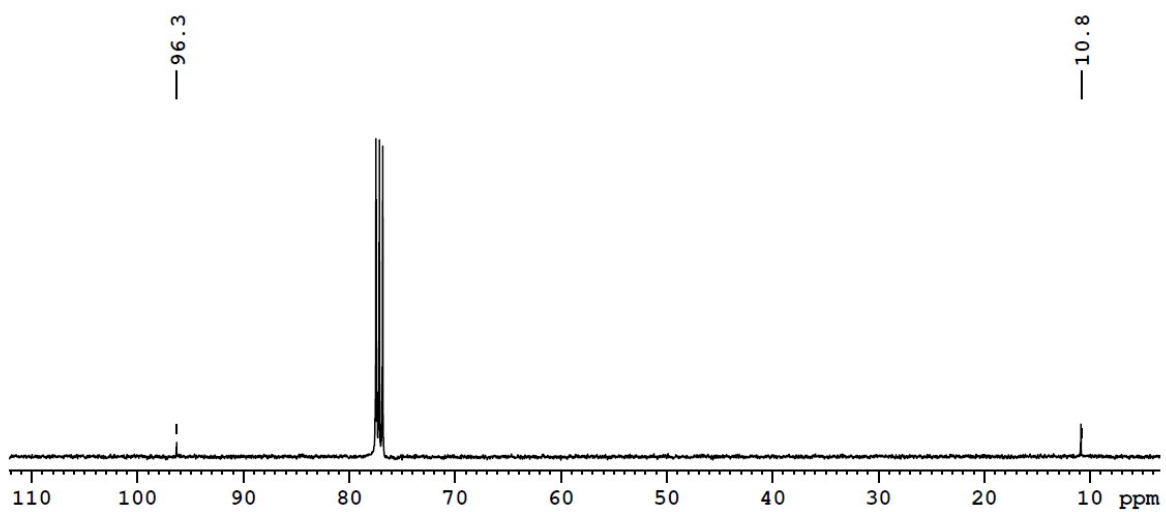

**Figure S16.**  $^{13}\text{C}\{^1\text{H}\}$  NMR spectrum of **2** in  $\text{CDCl}_3$ .

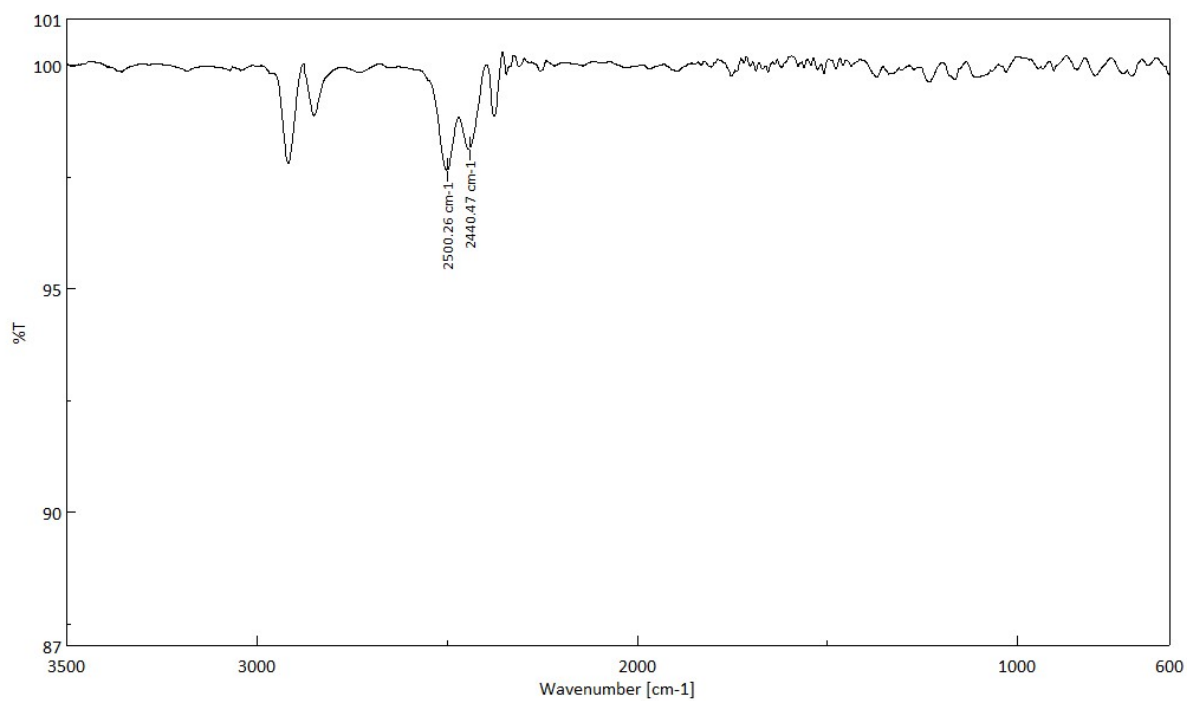

**Figure S17.** IR spectrum of **2** in  $\text{CH}_2\text{Cl}_2$ .

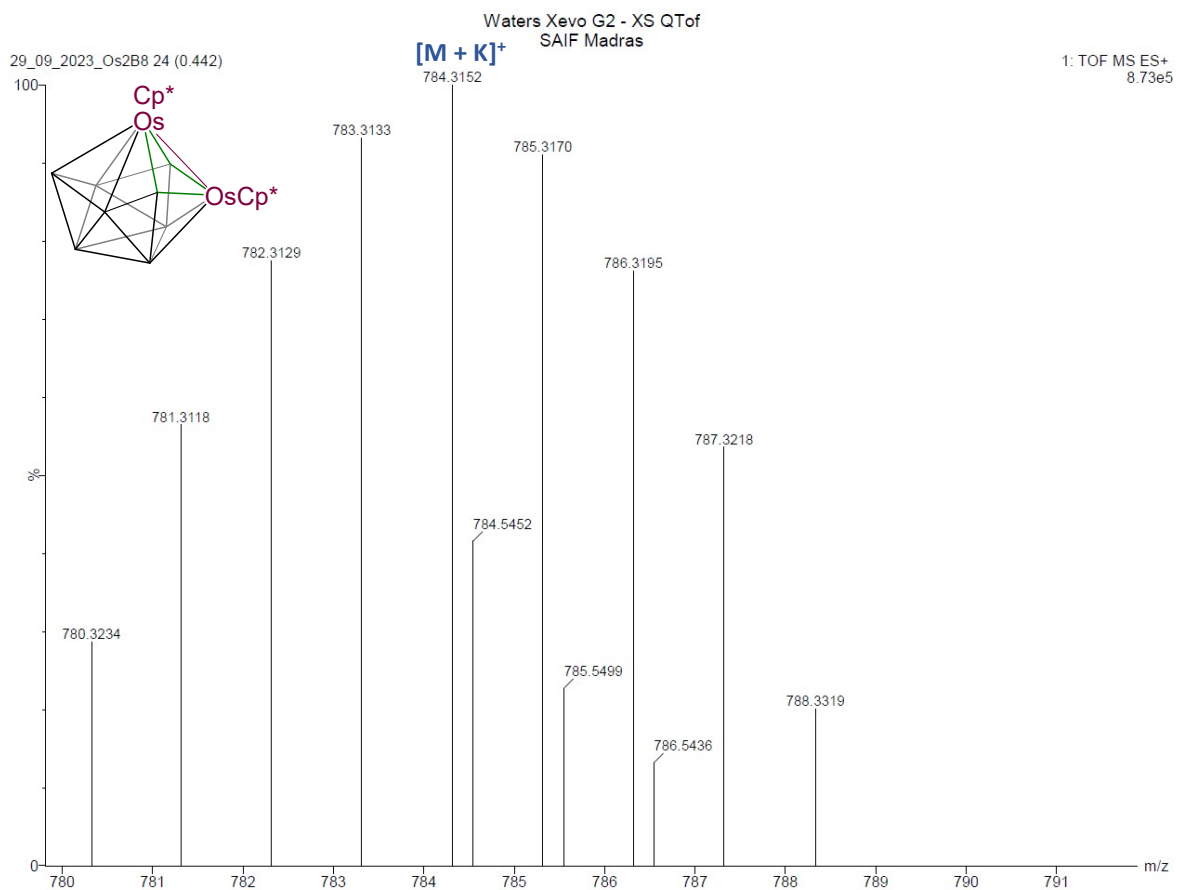

Figure S18. ESI-MS spectrum of 3.

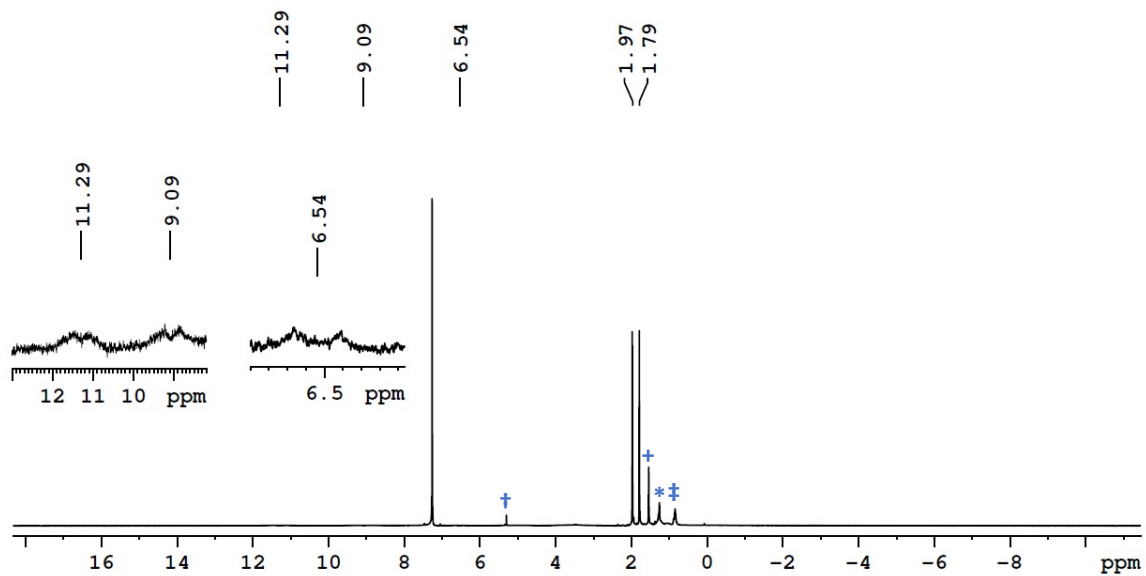

Figure S19. <sup>1</sup>H NMR spectrum of 3 in CDCl<sub>3</sub>. (†H-Grease, †CH<sub>2</sub>Cl<sub>2</sub>, +H<sub>2</sub>O, \*Hexane)



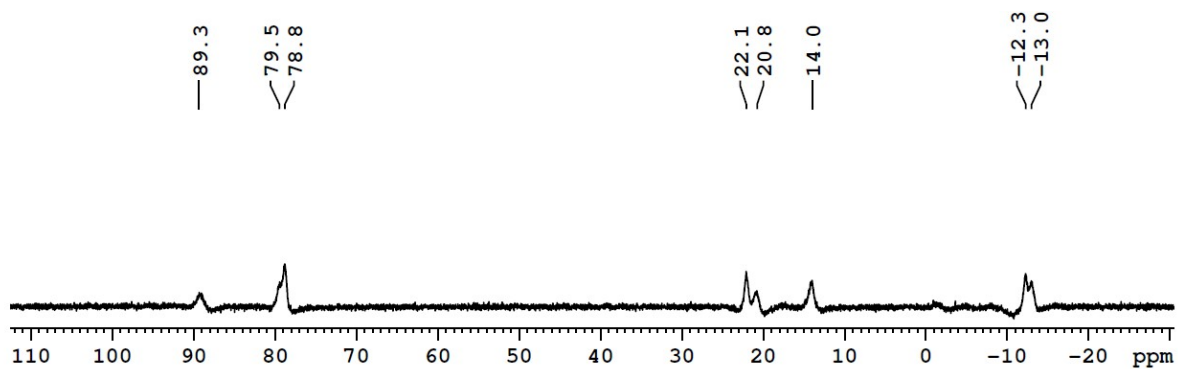

Figure S20.  $^{11}\text{B}\{^1\text{H}\}$  NMR spectrum of **3** in  $\text{CDCl}_3$ .

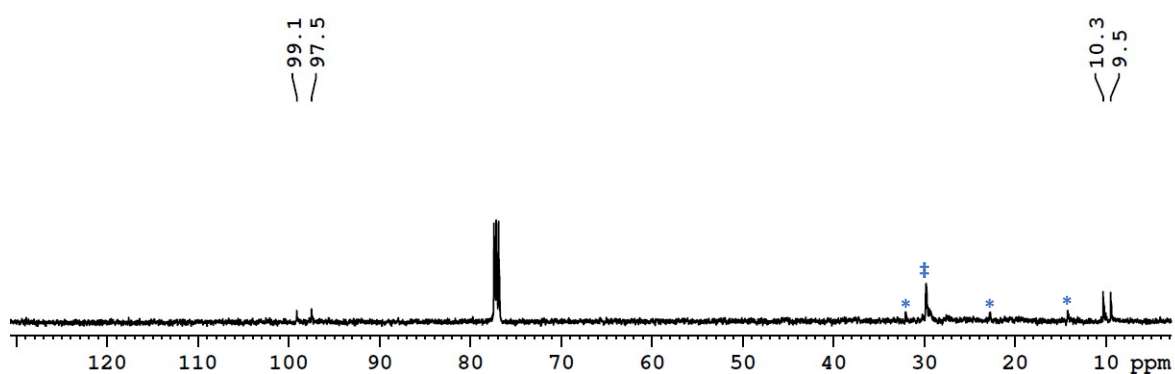

Figure S21.  $^{13}\text{C}\{^1\text{H}\}$  NMR spectrum of **3** in  $\text{CDCl}_3$ . (‡H-Grease, \*Hexane).

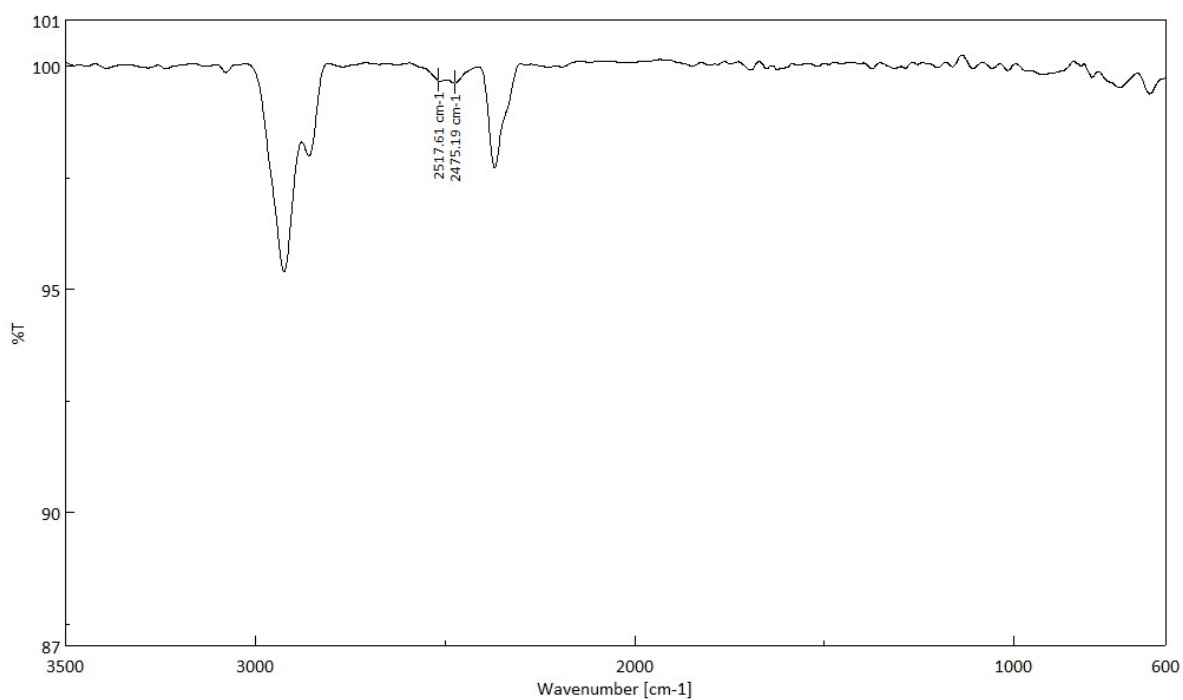

Figure S22. IR spectrum of **3** in  $\text{CH}_2\text{Cl}_2$ .

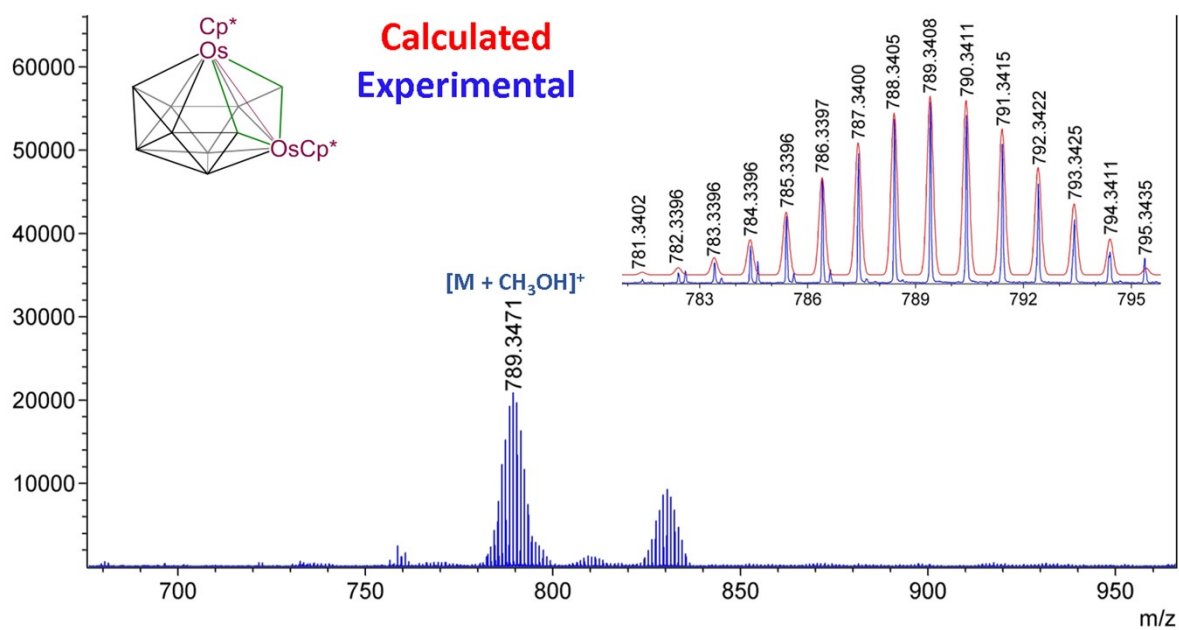

Figure S23. ESI-MS spectrum of **4**.

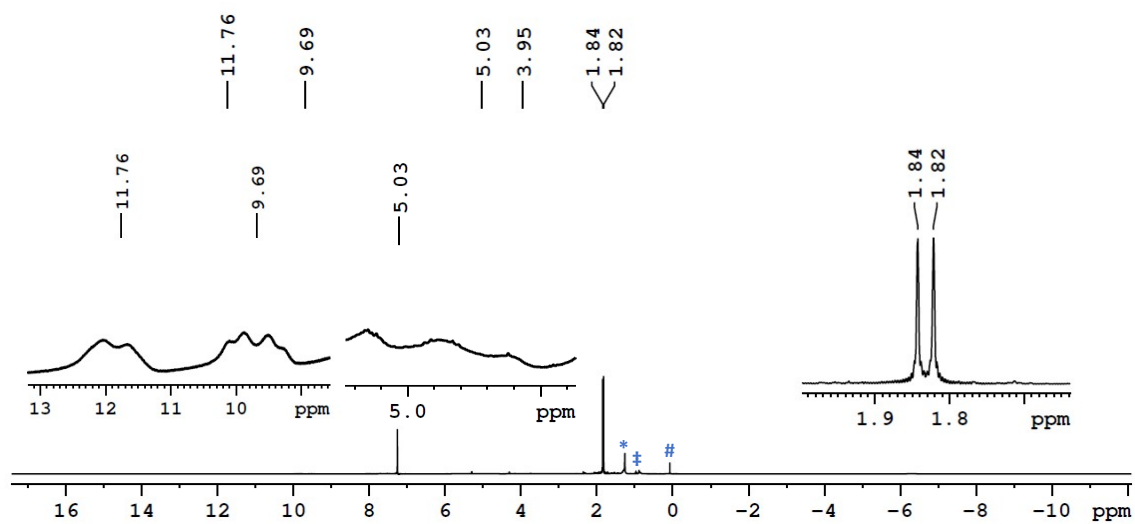

Figure S24.  $^1H$  NMR spectrum of **4** in  $CDCl_3$ . (# Silicon grease, ‡H-Grease, \*Hexane).

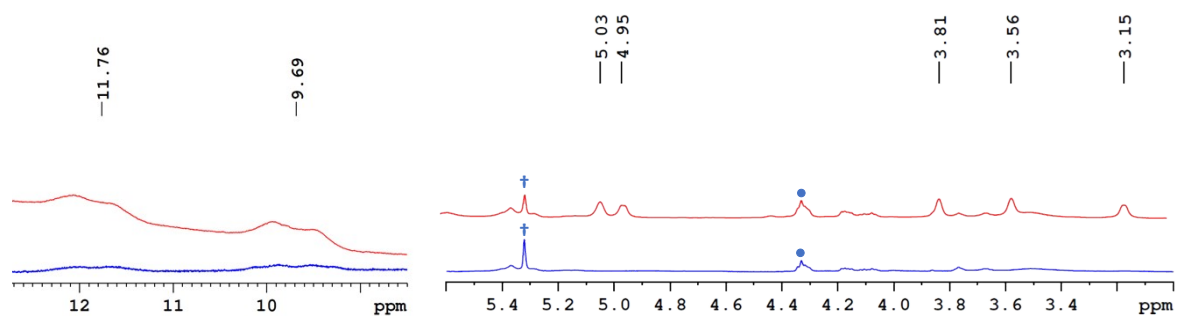

**Figure S25.** Stacked  $^1\text{H}$  (blue) and  $^1\text{H}\{^{11}\text{B}\}$  (red) NMR spectra of **4** in  $\text{CDCl}_3$ . (+ $\text{CH}_2\text{Cl}_2$ , •Inseparable impurity).

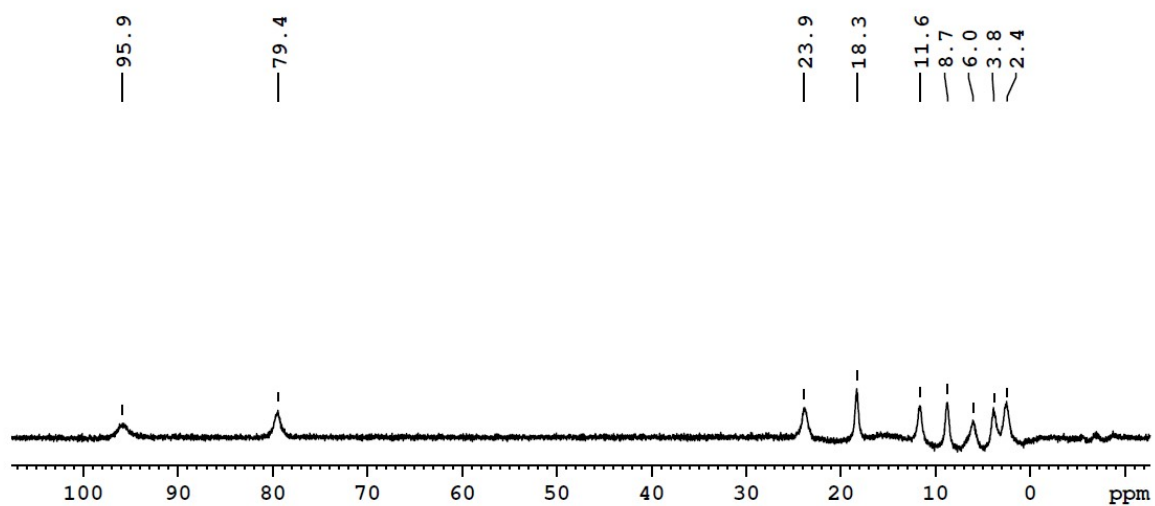

**Figure S26.**  $^{11}\text{B}\{^1\text{H}\}$  NMR spectrum of **4** in  $\text{CDCl}_3$ .

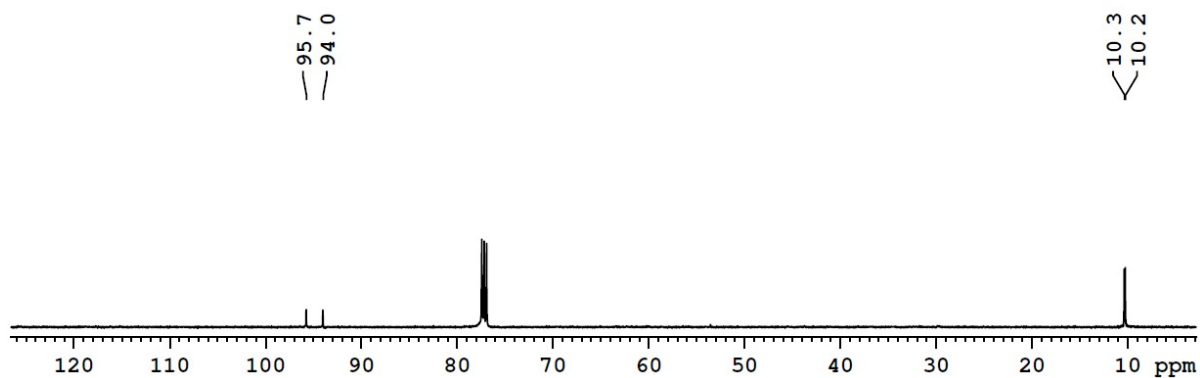

**Figure S27.**  $^{13}\text{C}\{^1\text{H}\}$  NMR spectrum of **4** in  $\text{CDCl}_3$ .

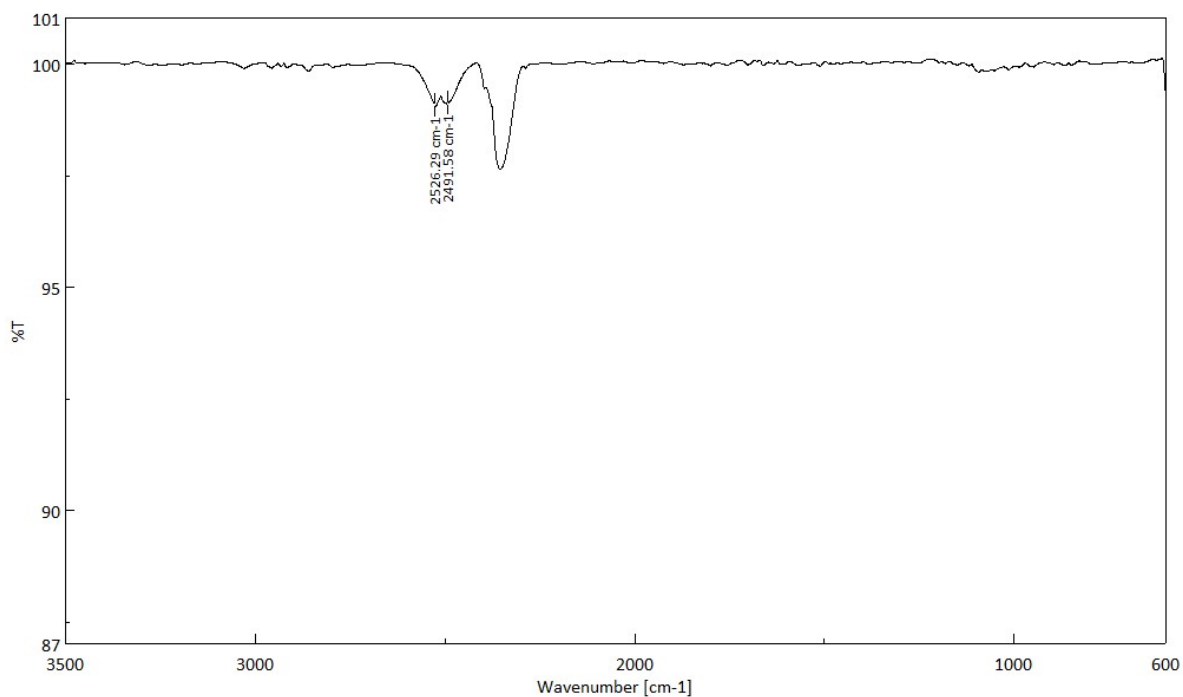

Figure S28. IR spectrum of 4 in CH<sub>2</sub>Cl<sub>2</sub>.

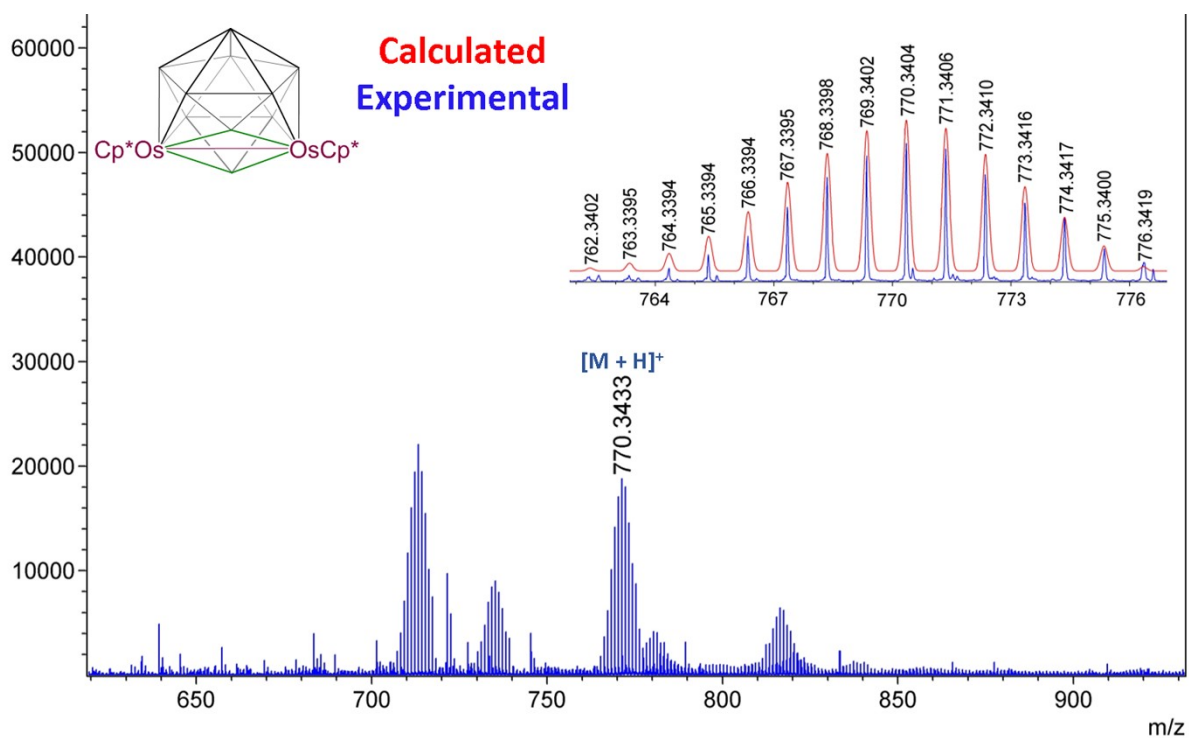

Figure 29. ESI-MS spectrum of 5.

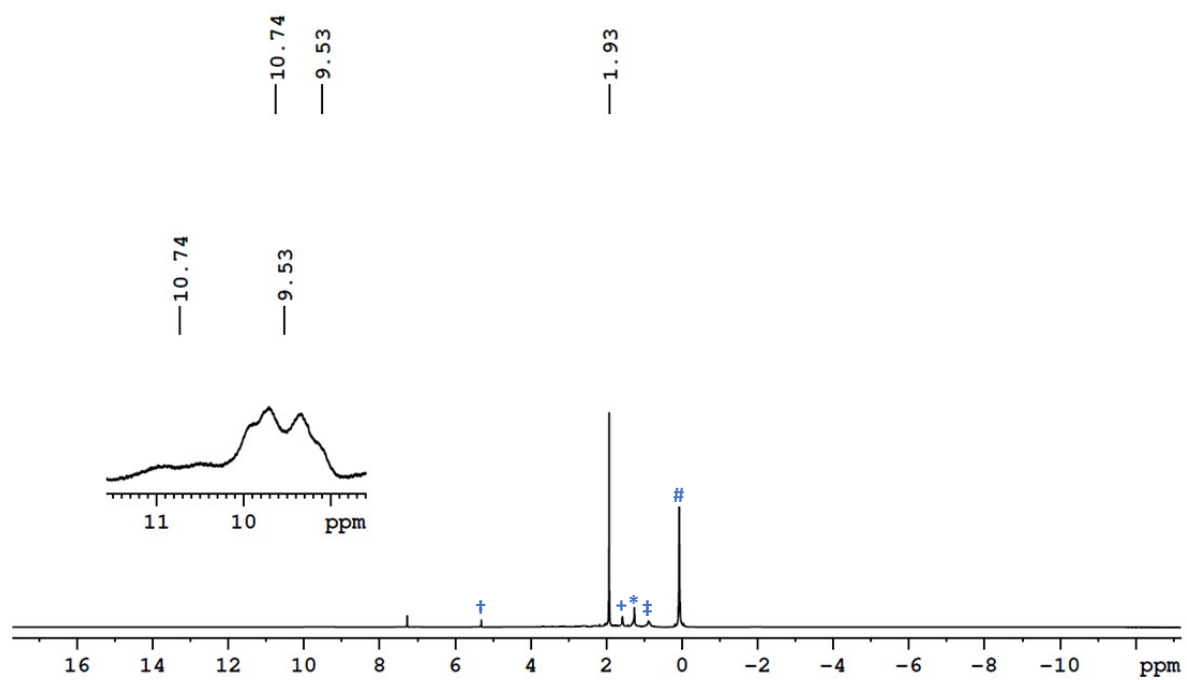

**Figure S30.**  $^1\text{H}$  NMR spectrum of **5** in  $\text{CDCl}_3$ . (#Silicon grease, ‡H-Grease, †CH<sub>2</sub>Cl<sub>2</sub>, †H<sub>2</sub>O, \*Hexane)

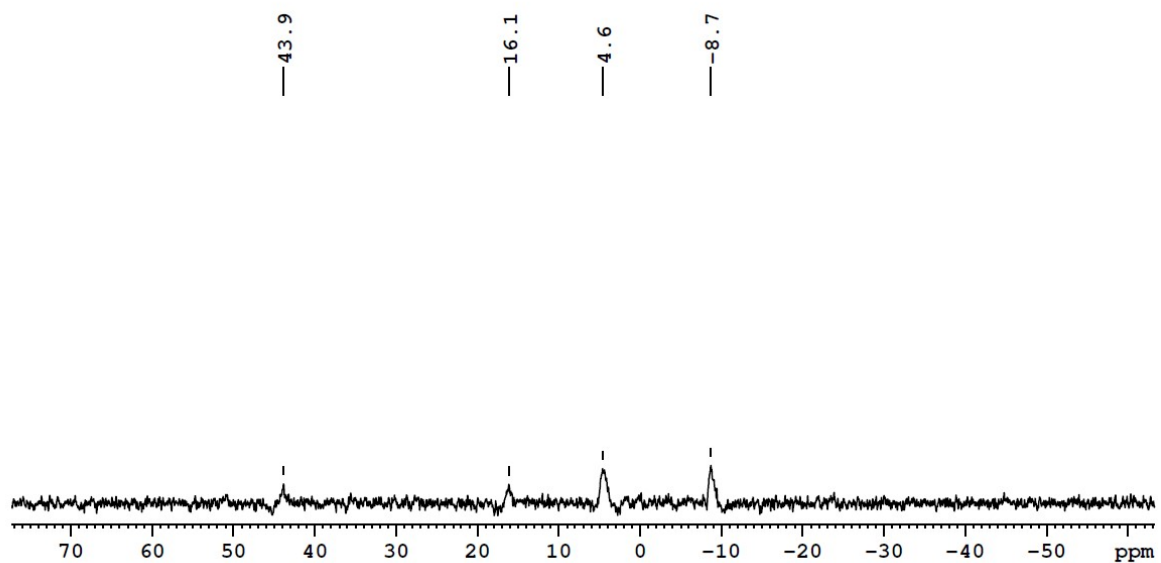

**Figure S31.**  $^{11}\text{B}\{^1\text{H}\}$  NMR spectrum of **5** in  $\text{CDCl}_3$ .

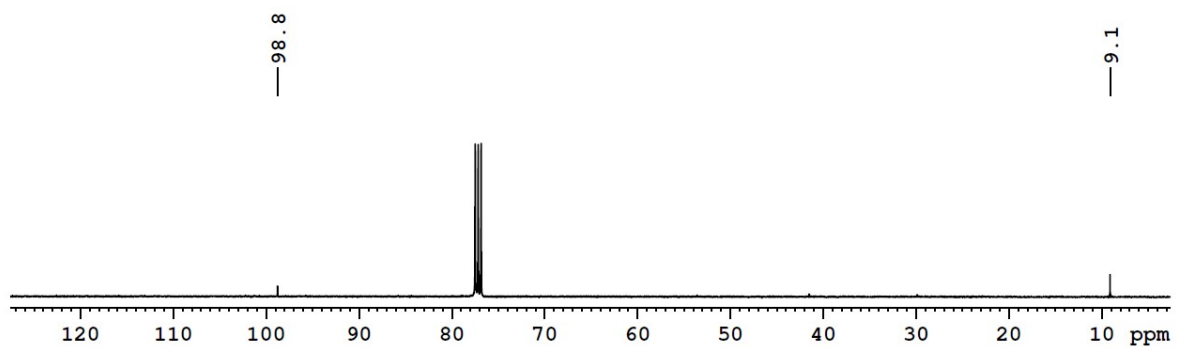

**Figure S32.**  $^{13}\text{C}\{^1\text{H}\}$  NMR spectrum of **5** in  $\text{CDCl}_3$ .

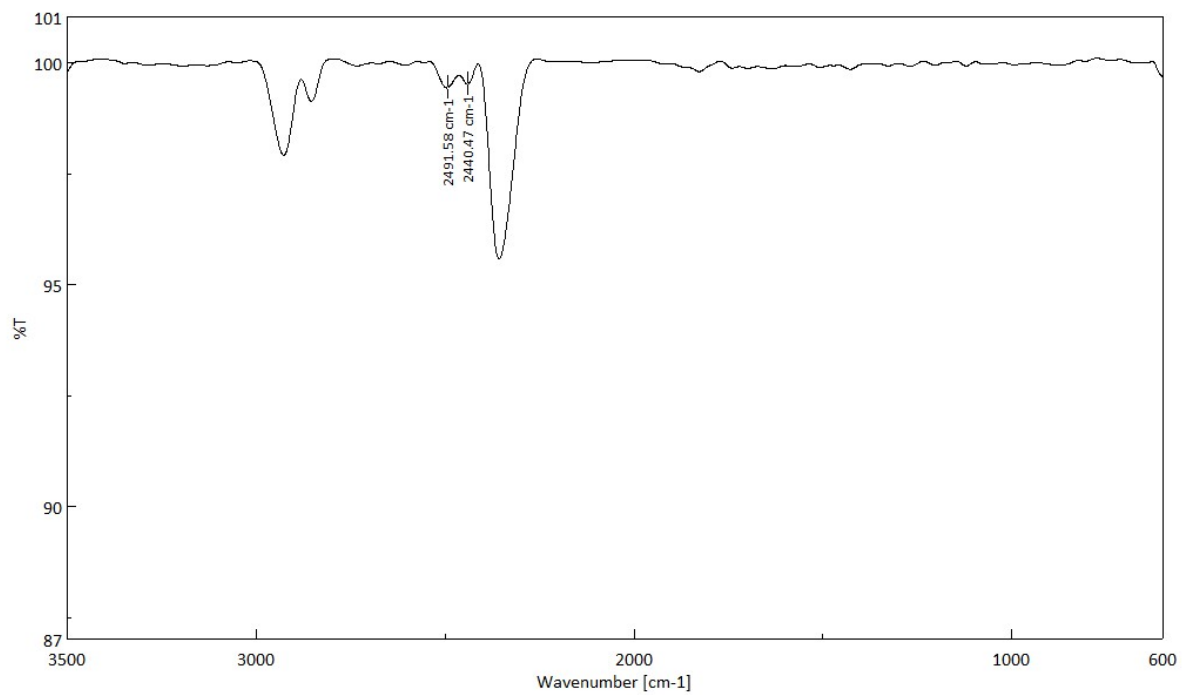

**Figure S33.** IR spectrum of **5** in  $\text{CH}_2\text{Cl}_2$ .

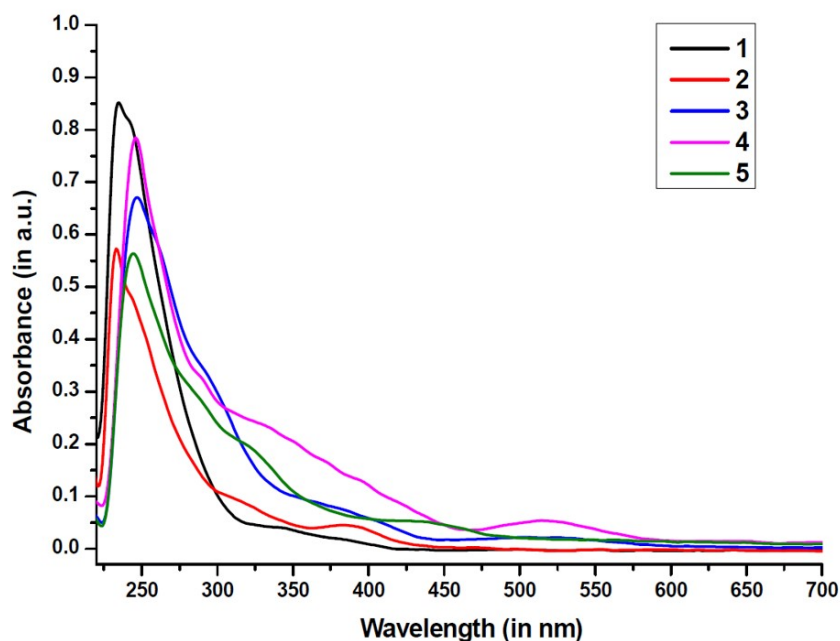

**Figure S34.** UV-Vis spectra of **1-5** in CH<sub>2</sub>Cl<sub>2</sub>.

### I.3 X-ray Analysis Details

Suitable X-ray quality crystals of **1**, **2**, **3**, **4** and **5** were grown by slow diffusion of a hexane-CH<sub>2</sub>Cl<sub>2</sub> solution at -4 °C. Crystal data of **1**, **3**, **4** and **5** were obtained and integrated using a D8 VENTURE Bruker AXS diffractometer with PHOTON II detector with graphite monochromated Mo-K $\alpha$  ( $\lambda = 0.71073$  Å) radiation at 298(2) K for **1**, **4**, **5** and for **3** 297(2) K. Crystal data of **2** was obtained and integrated using a Bruker APEX-II CCD diffractometer with graphite monochromated Mo-K $\alpha$  ( $\lambda = 0.71073$  Å) radiation at 296(2) K. All the structures were solved using SHELXT-2018 and SHELXS-97<sup>3</sup> and refined using SHELXL-2018, SHELXL-2014 and SHELXL-2019<sup>4</sup>. Using Olex2 all the molecular structures were drawn.<sup>5</sup> Crystallographic data have been deposited with the Cambridge Crystallographic Data Center as supplementary publication no CCDC- 2291109 (**1**), 2293942 (**2**), 2300469 (**3**), 2291111 (**4**) and 2291112 (**5**). These data can be obtained free of charge from The Cambridge Crystallographic Data Centre via [www.ccdc.cam.ac.uk/data\\_request/cif](http://www.ccdc.cam.ac.uk/data_request/cif).

Crystal data for **1**: C<sub>20</sub>H<sub>36</sub>B<sub>6</sub>Os<sub>2</sub>,  $M_r = 721.75$ , Monoclinic, space group  $P 21/c$ ,  $a = 8.5352(2)$  Å,  $b = 14.7848(4)$  Å,  $c = 20.0361(6)$  Å,  $\alpha = 90^\circ$ ,  $\beta = 101.894(1)^\circ$ ,  $\gamma = 90^\circ$ ,  $V = 2474.10(12)$  Å<sup>3</sup>,  $Z = 4$ ,  $\rho_{\text{calcd}} = 1.938$  g/cm<sup>3</sup>,  $\mu = 10.265$  mm<sup>-1</sup>,  $F(000) = 1352.0$ ,  $R_1 = 0.0304$ ,  $wR_2 = 0.0588$ , 6944 independent reflections [ $2\theta \leq 59.154^\circ$ ] and 260 parameters.

Crystal data for **2**:  $C_{20}H_{37}B_7Os_2$ ,  $M_r = 733.56$ , Tetragonal, space group  $P -4 21 c$ ,  $a = 23.6454(8)$  Å,  $b = 23.6454(8)$  Å,  $c = 8.8984(3)$  Å,  $\alpha = 90^\circ$ ,  $\beta = 90^\circ$ ,  $\gamma = 90^\circ$ ,  $V = 4975.1(4)$  Å<sup>3</sup>,  $Z = 8$ ,  $\rho_{\text{calcd}} = 1.959$  g/cm<sup>3</sup>,  $\mu = 10.211$  mm<sup>-1</sup>,  $F(000) = 2752.0$ ,  $R_1 = 0.0218$ ,  $wR_2 = 0.0376$ , 4381 independent reflections [ $2\theta \leq 49.974^\circ$ ] and 272 parameters.

Crystal data for **3**:  $C_{20}H_{38}B_8Os_2$ ,  $M_r = 745.38$ , Monoclinic, space group  $C c$ ,  $a = 9.172(3)$  Å,  $b = 15.337(5)$  Å,  $c = 19.588(6)$  Å,  $\alpha = 90^\circ$ ,  $\beta = 103.464(10)^\circ$ ,  $\gamma = 90^\circ$ ,  $V = 2679.6(14)$  Å<sup>3</sup>,  $Z = 4$ ,  $\rho_{\text{calcd}} = 1.848$  g/cm<sup>3</sup>,  $\mu = 9.480$  mm<sup>-1</sup>,  $F(000) = 1400.0$ ,  $R_1 = 0.0343$ ,  $wR_2 = 0.0740$ , 5967 independent reflections [ $2\theta \leq 56.64^\circ$ ] and 345 parameters.

Crystal data for **4**:  $C_{20}H_{39}B_9Os_2$ ,  $M_r = 757.20$ , Monoclinic, space group  $P 21/n$ ,  $a = 8.9252(10)$  Å,  $b = 14.6904(16)$  Å,  $c = 20.153(2)$  Å,  $\alpha = 90^\circ$ ,  $\beta = 99.649(5)^\circ$ ,  $\gamma = 90^\circ$ ,  $V = 2605.0(5)$  Å<sup>3</sup>,  $Z = 4$ ,  $\rho_{\text{calcd}} = 1.931$  g/cm<sup>3</sup>,  $\mu = 9.753$  mm<sup>-1</sup>,  $F(000) = 1424.0$ ,  $R_1 = 0.0489$ ,  $wR_2 = 0.1139$ , 4586 independent reflections [ $2\theta \leq 49.998^\circ$ ] and 284 parameters.

Crystal data for **5**:  $C_{20}H_{40}B_{10}Os_2$ ,  $M_r = 769.02$ , Monoclinic, space group  $P 21/n$ ,  $a = 8.891(8)$  Å,  $b = 15.195(11)$  Å,  $c = 19.952(18)$  Å,  $\alpha = 90^\circ$ ,  $\beta = 100.42(3)^\circ$ ,  $\gamma = 90^\circ$ ,  $V = 2651(4)$  Å<sup>3</sup>,  $Z = 4$ ,  $\rho_{\text{calcd}} = 1.927$  g/cm<sup>3</sup>,  $\mu = 9.584$  mm<sup>-1</sup>,  $F(000) = 1448.0$ ,  $R_1 = 0.0910$ ,  $wR_2 = 0.2329$ , 4642 independent reflections [ $2\theta \leq 49.996^\circ$ ] and 250 parameters.

## II Computational Details

All molecules were fully optimized using the *Gaussian 09*<sup>6</sup> program employing the bp86 functional<sup>7</sup> in conjunction with a def2-svp basis set from EMSL Basis Set Exchange Library.<sup>8</sup> The model compounds were fully optimized in gaseous state (no solvent effect) starting from the X-ray crystallographic coordinates. The calculations were performed with the Cp analogues instead of Cp\* to save computing time. Frequency calculations were performed at the same level of theory to verify the nature of the stationary states and the absence of any imaginary frequency to confirm that all structures represent minima on the potential energy hypersurface. Natural bonding analyses were performed with the natural bond orbital (NBO) partitioning scheme<sup>9</sup> as implemented in the Gaussian 09 suite of programs. Wiberg bond indexes (WBI)<sup>10</sup> were obtained from a natural bond orbital analysis. All the optimized structures and orbital graphics were generated using the Gaussview<sup>11</sup>, and Chemcraft<sup>12</sup> visualization programs.



**Table S1.** Bond parameters of clusters **1-5** are compared with their optimized values and WBIs. All distances are in Å.  $\Theta$  are the dihedral angles.

| [(Cp*Os) <sub>2</sub> B <sub>6</sub> H <sub>6</sub> ] (1) |            |         |       | [(Cp*Os) <sub>2</sub> B <sub>7</sub> H <sub>7</sub> ] (2) |           |         |       |
|-----------------------------------------------------------|------------|---------|-------|-----------------------------------------------------------|-----------|---------|-------|
|                                                           | Expt.      | Cal.    | WBI   |                                                           | Expt.     | Cal.    | WBI   |
| <b>Os1-Os2</b>                                            | 2.7688(3)  | 2.7577  | 0.367 | <b>Os1-Os2</b>                                            | 2.8051(5) | 2.8492  | 0.371 |
| <b>Os1-B4</b>                                             | 2.055(8)   | 2.088   | 0.683 | <b>Os1-B1</b>                                             | 2.081(12) | 2.109   | 0.651 |
| <b>Os1-B5</b>                                             | 2.060(7)   | 2.088   | 0.683 | <b>Os1-B4</b>                                             | 2.236(14) | 2.276   | 0.401 |
| <b>Os1-B1</b>                                             | 2.134(8)   | 2.152   | 0.557 | <b>Os1-B5</b>                                             | 2.030(11) | 2.066   | 0.712 |
| <b>Os1-B2</b>                                             | 2.249(9)   | 2.265   | 0.404 | <b>Os1-B6</b>                                             | 2.091(13) | 2.097   | 0.625 |
| <b>Os1-B6</b>                                             | 2.303(12)  | 2.265   | 0.404 | <b>Os1-B7</b>                                             | 2.246(13) | 2.335   | 0.369 |
| <b>Os2-B4</b>                                             | 2.062(7)   | 2.088   | 0.683 | <b>Os2-B1</b>                                             | 2.180(11) | 2.239   | 0.498 |
| <b>Os2-B5</b>                                             | 2.084(8)   | 2.088   | 0.683 | <b>Os2-B2</b>                                             | 2.121(15) | 2.125   | 0.583 |
| <b>Os2-B3</b>                                             | 2.155(8)   | 2.152   | 0.557 | <b>Os2-B3</b>                                             | 2.222(12) | 2.308   | 0.407 |
| <b>Os2-B6</b>                                             | 2.234(11)  | 2.265   | 0.404 | <b>Os2-B4</b>                                             | 2.179(13) | 2.205   | 0.456 |
| <b>Os2-B2</b>                                             | 2.298(12)  | 2.265   | 0.404 | <b>Os2-B5</b>                                             | 2.040(12) | 2.097   | 0.656 |
| <b>B1-B6</b>                                              | 1.735(14)  | 1.757   | 0.603 | <b>B1-B2</b>                                              | 1.72(2)   | 1.778   | 0.538 |
| <b>B1-B3</b>                                              | 1.742(13)  | 1.745   | 0.611 | <b>B1-B7</b>                                              | 1.84(2)   | 1.818   | 0.542 |
| <b>B1-B2</b>                                              | 1.759(14)  | 1.757   | 0.603 | <b>B2-B7</b>                                              | 1.66(2)   | 1.706   | 0.682 |
| <b>B2-B3</b>                                              | 1.699(14)  | 1.757   | 0.602 | <b>B2-B3</b>                                              | 1.71(2)   | 1.802   | 0.503 |
| <b>B2-B5</b>                                              | 1.765(14)  | 1.807   | 0.539 | <b>B3-B6</b>                                              | 1.73(2)   | 1.791   | 0.555 |
| <b>B3-B6</b>                                              | 1.691(14)  | 1.757   | 0.603 | <b>B3-B4</b>                                              | 1.76(2)   | 1.752   | 0.621 |
| <b>B4-B6</b>                                              | 1.755(14)  | 1.807   | 0.539 | <b>B3-B7</b>                                              | 1.98(2)   | 1.939   | 0.432 |
| <b><math>\Theta</math> (B4-Os1-Os2-B5)</b>                | 145.33°    | 140.13° | -     | <b>B4-B6</b>                                              | 1.67(2)   | 1.774   | 0.547 |
|                                                           |            |         |       | <b>B4-B5</b>                                              | 1.78(2)   | 1.803   | 0.530 |
|                                                           |            |         |       | <b>B6-B7</b>                                              | 1.71(2)   | 1.783   | 0.537 |
|                                                           |            |         |       | <b><math>\Theta</math> (B1-Os1-Os2-B5)</b>                | 152.17°   | 152.50° | -     |
| [(Cp*Os) <sub>2</sub> B <sub>8</sub> H <sub>8</sub> ] (3) |            |         |       | [(Cp*Os) <sub>2</sub> B <sub>9</sub> H <sub>9</sub> ] (4) |           |         |       |
|                                                           | Expt.      | Cal.    | WBI   |                                                           | Expt.     | Cal.    | WBI   |
| <b>Os1-Os2</b>                                            | 2.9046(11) | 2.6300  | 0.756 | <b>Os1-Os2</b>                                            | 2.8505(7) | 2.8580  | 0.351 |
| <b>Os1-B5</b>                                             | 2.14(4)    | 2.250   | 0.421 | <b>Os1-B1</b>                                             | 2.293(19) | 2.431   | 0.326 |
| <b>Os1-B6</b>                                             | 2.18(4)    | 2.242   | 0.411 | <b>Os1-B2</b>                                             | 2.229(18) | 2.208   | 0.482 |
| <b>Os1-B7</b>                                             | 2.22(4)    | 2.118   | 0.600 | <b>Os1-B3</b>                                             | 2.321(18) | 2.382   | 0.343 |
| <b>Os1-B8</b>                                             | 2.13(3)    | 2.105   | 0.594 | <b>Os1-B7</b>                                             | 2.159(17) | 2.226   | 0.489 |
| <b>Os2-B1</b>                                             | 2.28(4)    | 2.111   | 0.590 | <b>Os1-B8</b>                                             | 2.210(19) | 2.259   | 0.368 |
| <b>Os2-B3</b>                                             | 2.35(3)    | 2.358   | 0.330 | <b>Os1-B9</b>                                             | 2.175(17) | 2.252   | 0.473 |
| <b>Os2-B4</b>                                             | 2.48(5)    | 2.366   | 0.331 | <b>Os2-B4</b>                                             | 2.217(18) | 2.257   | 0.406 |
| <b>Os2-B7</b>                                             | 2.16(3)    | 2.166   | 0.550 | <b>Os2-B5</b>                                             | 2.212(19) | 2.270   | 0.413 |
| <b>Os2-B8</b>                                             | 2.14(3)    | 2.204   | 0.507 | <b>Os2-B7</b>                                             | 2.138(17) | 2.115   | 0.599 |
| <b>B1-B4</b>                                              | 1.68(6)    | 1.760   | 0.577 | <b>Os2-B8</b>                                             | 2.13(2)   | 2.135   | 0.474 |
| <b>B1-B2</b>                                              | 1.77(5)    | 1.742   | 0.570 | <b>Os2-B9</b>                                             | 2.051(18) | 2.121   | 0.612 |
| <b>B1-B3</b>                                              | 1.78(5)    | 1.754   | 0.586 | <b>B1-B2</b>                                              | 1.49(4)   | 1.735   | 0.603 |
| <b>B2-B4</b>                                              | 1.77(6)    | 1.838   | 0.479 | <b>B1-B6</b>                                              | 1.70(4)   | 1.829   | 0.491 |
| <b>B2-B6</b>                                              | 1.78(5)    | 1.821   | 0.505 | <b>B1-B8</b>                                              | 1.77(3)   | 1.679   | 0.684 |
| <b>B2-B5</b>                                              | 1.78(5)    | 1.803   | 0.513 | <b>B1-B5</b>                                              | 2.05(3)   | 1.907   | 0.420 |
| <b>B2-B3</b>                                              | 1.80(5)    | 1.826   | 0.489 | <b>B2-B3</b>                                              | 1.57(4)   | 1.722   | 0.626 |
| <b>B3-B5</b>                                              | 1.79(5)    | 1.778   | 0.573 | <b>B2-B6</b>                                              | 1.82(3)   | 1.738   | 0.589 |
| <b>B3-B7</b>                                              | 1.86(5)    | 1.783   | 0.585 | <b>B3-B7</b>                                              | 1.69(3)   | 1.758   | 0.595 |
| <b>B4-B8</b>                                              | 1.73(6)    | 1.745   | 0.627 | <b>B3-B4</b>                                              | 1.70(3)   | 1.787   | 0.544 |
| <b>B4-B6</b>                                              | 1.80(5)    | 1.792   | 0.548 | <b>B3-B6</b>                                              | 1.85(4)   | 1.807   | 0.492 |
| <b>B5-B6</b>                                              | 1.80(5)    | 1.902   | 0.470 | <b>B4-B6</b>                                              | 1.73(3)   | 1.809   | 0.508 |
| <b>B5-B7</b>                                              | 1.92(5)    | 1.874   | 0.472 | <b>B4-B7</b>                                              | 1.83(3)   | 1.833   | 0.488 |
| <b>B6-B8</b>                                              | 1.80(5)    | 1.827   | 0.526 | <b>B4-B5</b>                                              | 1.86(4)   | 1.814   | 0.532 |
| <b><math>\Theta</math> (B7-Os1-Os2-B8)</b>                | 152.11°    | 152.16° | -     | <b>B5-B6</b>                                              | 1.74(4)   | 1.827   | 0.508 |
|                                                           |            |         |       | <b>B5-B8</b>                                              | 1.91(3)   | 1.740   | 0.569 |
|                                                           |            |         |       | <b>B8-B9</b>                                              | 1.52(3)   | 1.655   | 0.698 |
|                                                           |            |         |       | <b><math>\Theta</math> (B7-Os1-Os2-B9)</b>                | 156.61°   | 157.30° | -     |

| [(Cp*Os) <sub>2</sub> B <sub>10</sub> H <sub>10</sub> ] (5) |          |         |       |
|-------------------------------------------------------------|----------|---------|-------|
|                                                             | Expt.    | Cal.    | WBI   |
| <b>Os1-Os2</b>                                              | 2.832(2) | 2.591   | 0.836 |
| <b>Os1-B1</b>                                               | 2.14(4)  | 2.151   | 0.520 |
| <b>Os1-B2</b>                                               | 2.20(4)  | 2.309   | 0.346 |
| <b>Os1-B3</b>                                               | 2.22(4)  | 2.237   | 0.453 |
| <b>Os1-B8</b>                                               | 2.57(4)  | 2.309   | 0.346 |
| <b>Os1-B9</b>                                               | 2.19(4)  | 2.151   | 0.520 |
| <b>Os2-B1</b>                                               | 2.15(4)  | 2.151   | 0.520 |
| <b>Os2-B5</b>                                               | 2.20(4)  | 2.238   | 0.453 |
| <b>Os2-B6</b>                                               | 2.24(4)  | 2.309   | 0.346 |
| <b>Os2-B9</b>                                               | 2.16(4)  | 2.151   | 0.520 |
| <b>Os2-B10</b>                                              | 2.19(4)  | 2.309   | 0.346 |
| <b>B1-B6</b>                                                | 1.69(5)  | 1.766   | 0.579 |
| <b>B1-B2</b>                                                | 1.79(5)  | 1.766   | 0.579 |
| <b>B2-B3</b>                                                | 1.76(6)  | 1.839   | 0.506 |
| <b>B2-B7</b>                                                | 1.77(6)  | 1.782   | 0.526 |
| <b>B2-B6</b>                                                | 1.79(6)  | 1.790   | 0.521 |
| <b>B3-B4</b>                                                | 1.65(5)  | 1.801   | 0.497 |
| <b>B3-B7</b>                                                | 1.73(6)  | 1.801   | 0.497 |
| <b>B3-B8</b>                                                | 1.97(6)  | 1.839   | 0.506 |
| <b>B4-B8</b>                                                | 1.64(5)  | 1.782   | 0.526 |
| <b>B4-B5</b>                                                | 1.67(6)  | 1.801   | 0.497 |
| <b>B4-B7</b>                                                | 1.73(6)  | 1.798   | 0.519 |
| <b>B4-B10</b>                                               | 1.77(6)  | 1.782   | 0.527 |
| <b>B5-B7</b>                                                | 1.67(6)  | 1.801   | 0.497 |
| <b>B5-B10</b>                                               | 1.77(6)  | 1.840   | 0.505 |
| <b>B5-B6</b>                                                | 1.83(6)  | 1.840   | 0.505 |
| <b>B6-B7</b>                                                | 1.71(6)  | 1.782   | 0.527 |
| <b>B8-B10</b>                                               | 1.58(5)  | 1.789   | 0.521 |
| <b>B8-B9</b>                                                | 1.71(5)  | 1.766   | 0.579 |
| <b>B9-B10</b>                                               | 1.59(5)  | 1.766   | 0.579 |
| <b>∠ (B1-Os1-Os2-B9)</b>                                    | 176.39°  | 176.40° | -     |

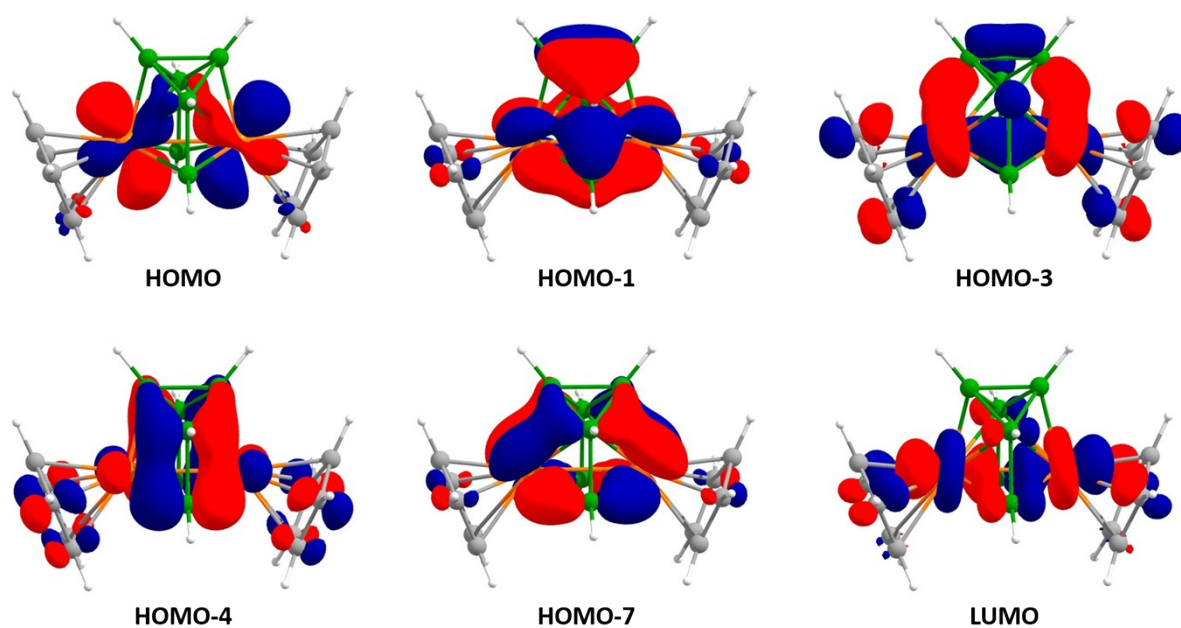

**Figure S35.** Selected molecular orbitals of cluster **1** (isocontour values:  $\pm 0.043$  [e.bohr<sup>-3</sup>]<sup>1/2</sup>).

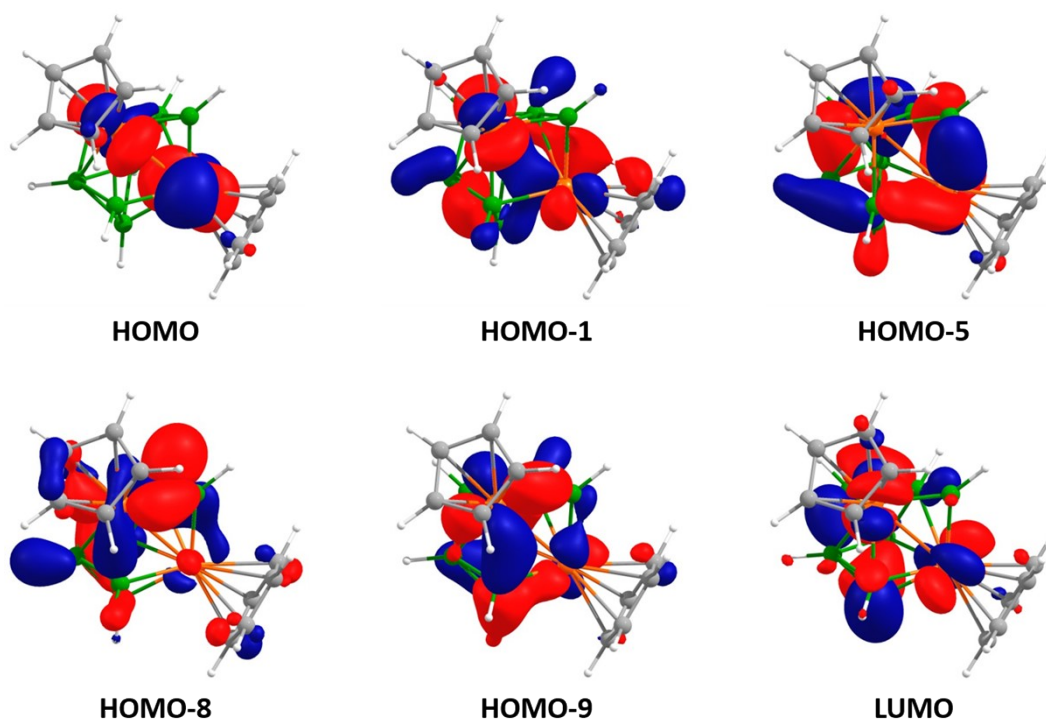

**Figure S36.** Selected molecular orbitals of cluster **2** (isocontour values:  $\pm 0.043$  [e.bohr<sup>-3</sup>]<sup>1/2</sup>).

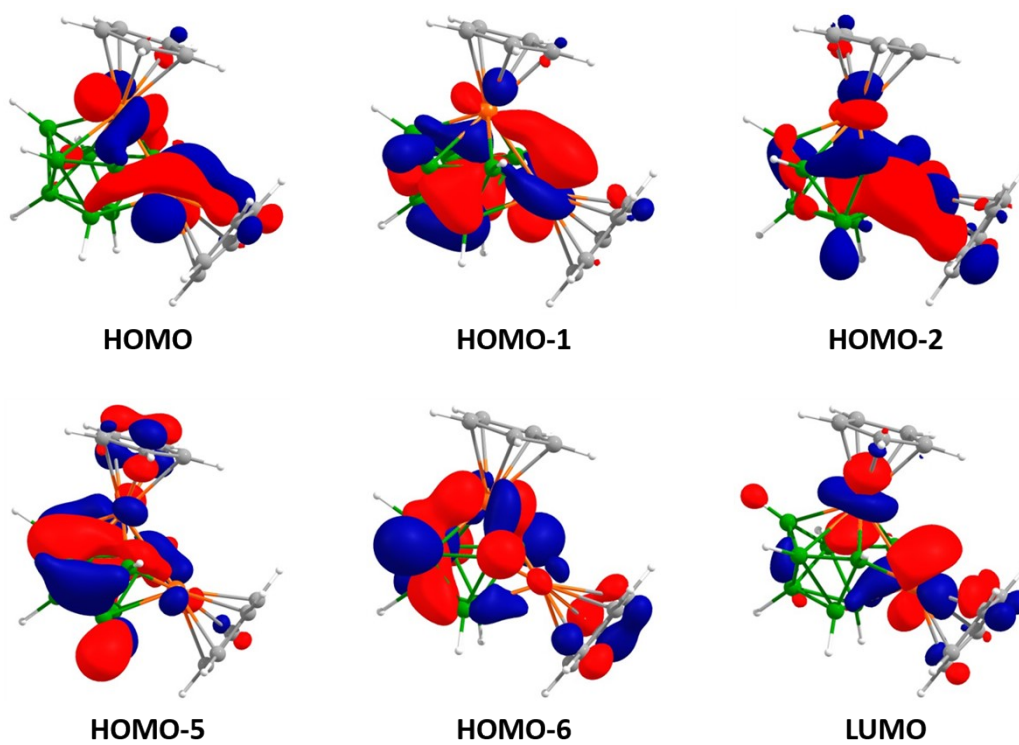

**Figure S37.** Selected molecular orbitals of cluster **3** (isocontour values:  $\pm 0.043$  [e.bohr<sup>-3</sup>]<sup>1/2</sup>).

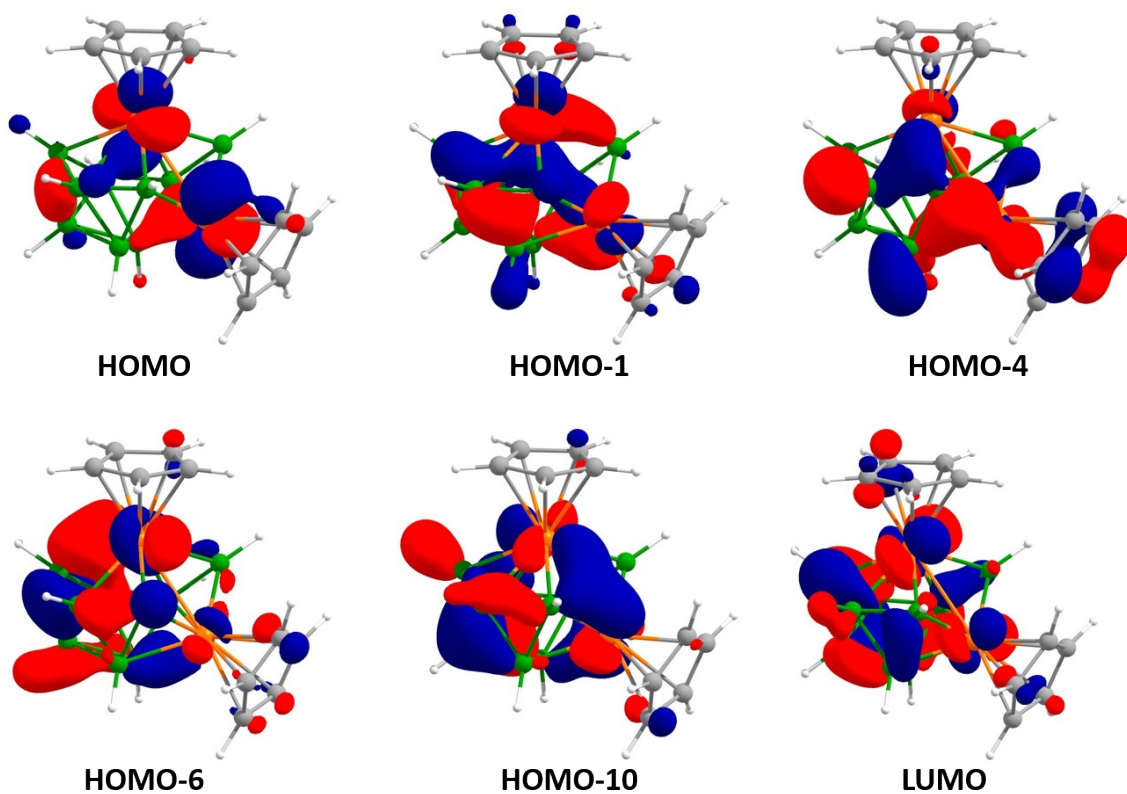

**Figure S38.** Selected molecular orbitals of cluster 4 (isocontour values:  $\pm 0.043$  [e.bohr<sup>-3</sup>]<sup>1/2</sup>).

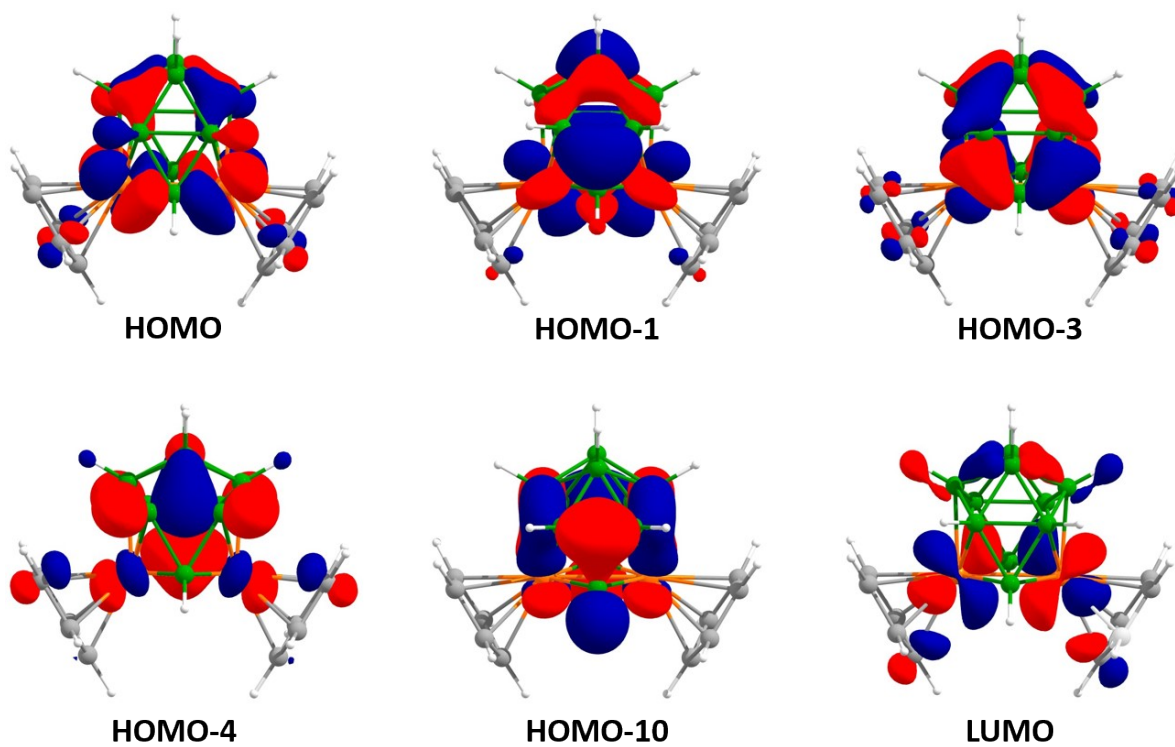

**Figure S39.** Selected molecular orbitals of cluster 5 (isocontour values:  $\pm 0.043$  [e.bohr<sup>-3</sup>]<sup>1/2</sup>).

**Table S2.** Calculated natural charges ( $q_{Os}$ , and  $q_B$ ), natural valence populations ( $Pop$ ) and HOMO–LUMO gaps ( $\Delta E_{H-L}$ ) of clusters **1-5**.

| Compounds | $q_{Os}$ | $q_B$  | $Pop (Os_{val})$ | $Pop (B_{val})$ | $\Delta E_{H-L}$ (eV) |
|-----------|----------|--------|------------------|-----------------|-----------------------|
| <b>1</b>  | -0.493   | 0.005  | 8.490            | 2.964           | 3.333                 |
|           | -0.493   | -0.148 | 8.490            | 3.115           |                       |
|           |          | 0.005  |                  | 2.964           |                       |
|           |          | 0.362  |                  | 2.602           |                       |
|           |          | -0.148 |                  | 3.115           |                       |
|           |          | 0.362  |                  | 2.602           |                       |
| <b>2</b>  | -0.437   | 0.110  | 8.437            | 2.850           | 2.031                 |
|           | -0.421   | 0.001  | 8.415            | 2.961           |                       |
|           |          | -0.062 |                  | 3.028           |                       |
|           |          | -0.157 |                  | 3.122           |                       |
|           |          | 0.344  |                  | 2.620           |                       |
|           |          | 0.074  |                  | 2.892           |                       |
|           |          | -0.118 |                  | 3.085           |                       |
| <b>3</b>  | -0.225   | -0.013 | 8.230            | 2.976           | 0.518                 |
|           | -0.289   | -0.118 | 8.287            | 3.087           |                       |
|           |          | -0.158 |                  | 3.125           |                       |
|           |          | -0.154 |                  | 3.121           |                       |
|           |          | -0.038 |                  | 3.001           |                       |
|           |          | -0.050 |                  | 3.015           |                       |
|           |          | 0.112  |                  | 2.846           |                       |
|           |          | 0.038  |                  | 2.921           |                       |
| <b>4</b>  | -0.405   | -0.095 | 8.399            | 3.066           | 2.325                 |
|           | -0.431   | 0.001  | 8.430            | 2.961           |                       |
|           |          | -0.185 |                  | 3.151           |                       |
|           |          | -0.089 |                  | 3.050           |                       |
|           |          | -0.038 |                  | 3.005           |                       |
|           |          | -0.108 |                  | 3.078           |                       |
|           |          | 0.142  |                  | 2.817           |                       |
|           |          | -0.132 |                  | 3.093           |                       |
|           |          | 0.213  |                  | 2.754           |                       |
| <b>5</b>  | -0.243   | 0.027  | 8.246            | 2.930           | 0.851                 |
|           | -0.242   | -0.094 | 8.245            | 3.055           |                       |
|           |          | -0.063 |                  | 3.027           |                       |
|           |          | -0.161 |                  | 3.128           |                       |
|           |          | -0.062 |                  | 3.025           |                       |
|           |          | -0.094 |                  | 3.055           |                       |
|           |          | -0.161 |                  | 3.128           |                       |
|           |          | -0.094 |                  | 3.055           |                       |
|           |          | 0.027  |                  | 2.930           |                       |
|           |          | -0.094 |                  | 3.055           |                       |

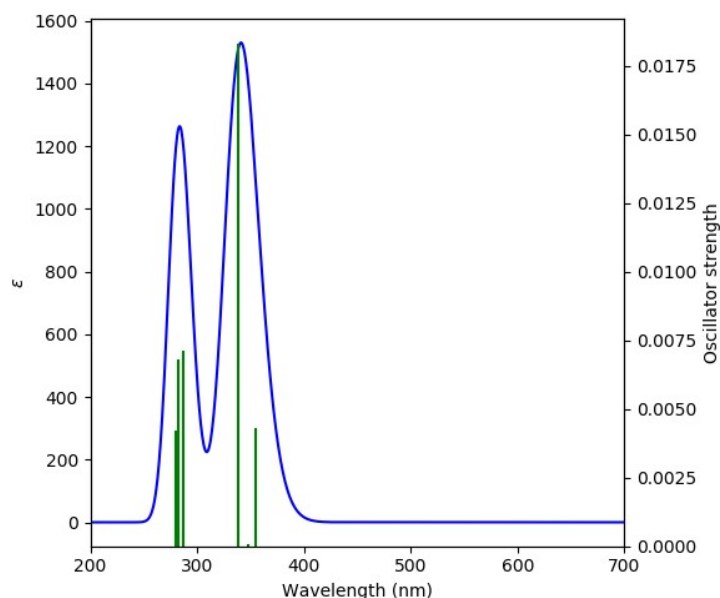

**Fig. S40.** Calculated absorption spectrum of **1** using TD-BP86/def2-svp level of theory.

**Table S3.** TD-DFT calculated electronic transition configuration for **1** along with their corresponding excitation energies, wavelength and oscillator strengths

HOMO is 69

| No | Transition configurations (%) <sup>[a]</sup> | Excitation Energy (ev) | Wavelength (nm) |                    | Osc, Strength |
|----|----------------------------------------------|------------------------|-----------------|--------------------|---------------|
|    |                                              |                        | Cal.            | Expt.              |               |
| 1  | HOMO→LUMO(99)                                | 3.4949                 | 354.7574        |                    | 0.0043        |
| 2  | HOMO→LUMO+2(99)                              | 3.5696                 | 347.3335        |                    | 0.0001        |
| 3  | HOMO→LUMO+1(92)                              | 3.6574                 | 338.9954        | 342 <sup>[b]</sup> | 0.0183        |
| 4  | HOMO→LUMO+3(99)                              | 3.9244                 | 315.9315        |                    | 0.0           |
| 5  | HOMO-1→LUMO(95)                              | 4.2594                 | 291.0837        |                    | 0.0           |
| 6  | HOMO-3→LUMO(85)                              | 4.3191                 | 287.0602        |                    | 0.0071        |
|    | HOMO-1→LUMO+2(11)                            |                        |                 |                    |               |
| 7  | HOMO-3→LUMO+2(86)                            | 4.3810                 | 283.0043        |                    | 0.0           |
|    | HOMO-2→LUMO+2(13)                            |                        |                 |                    |               |
| 8  | HOMO-4→LUMO(40)                              | 4.3896                 | 282.4498        |                    | 0.0068        |
|    | HOMO-1→LUMO+1(59)                            |                        |                 |                    |               |
| 9  | HOMO-3→LUMO+2(13)                            | 4.3983                 | 281.8911        |                    | 0.0           |
|    | HOMO-2→LUMO+2(83)                            |                        |                 |                    |               |
| 10 | HOMO-3→LUMO(12)                              | 4.4266                 | 280.0889        |                    | 0.0042        |
|    | HOMO-2→LUMO(30)                              |                        |                 |                    |               |
|    | HOMO-2→LUMO+2(32)                            |                        |                 |                    |               |
|    | HOMO→LUMO+4(24)                              |                        |                 |                    |               |

<sup>[a]</sup>components with greater than 10% contribution shown, <sup>[b]</sup>shoulder peak

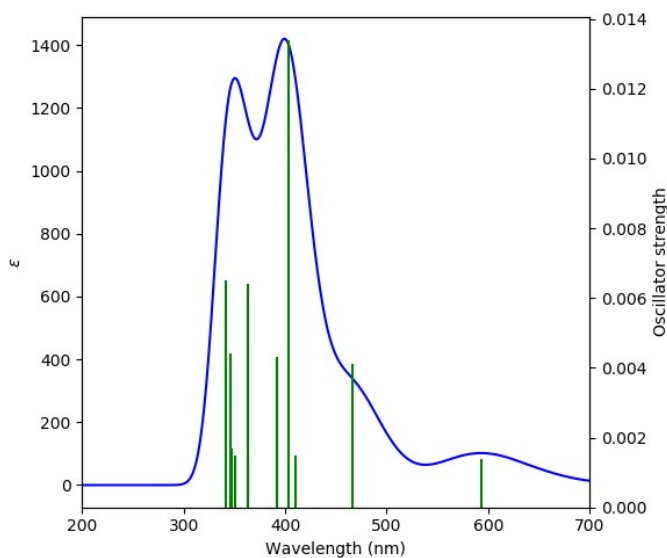

**Fig. S41.** Calculated absorption spectrum of **2** using TD-BP86/def2-svp level of theory.

**Table S4.** TD-DFT calculated electronic transition configuration for **2** along with their corresponding excitation energies, wavelength and oscillator strengths

HOMO is 72

| No | Transition configurations (%) <sup>[a]</sup> | Excitation Energy (ev) | Wavelength (nm) |                    | Osc, Strength |
|----|----------------------------------------------|------------------------|-----------------|--------------------|---------------|
|    |                                              |                        | Cal.            | Expt.              |               |
| 1  | HOMO→LUMO(99)                                | 2.0880                 | 593.79402       |                    | 0.0014        |
| 2  | HOMO-1→LUMO(93)                              | 2.6562                 | 466.7728        |                    | 0.0041        |
| 3  | HOMO-2→LUMO(71)                              | 3.0215                 | 410.3398        |                    | 0.0015        |
| 4  | HOMO→LUMO+1(26)                              | 3.0713                 | 403.6863        | 385                | 0.0134        |
|    | HOMO-2→LUMO(21)                              |                        |                 |                    |               |
| 5  | HOMO→LUMO+1(70)                              | 3.1620                 | 392.1068        |                    | 0.0043        |
|    | HOMO-3→LUMO(95)                              |                        |                 |                    |               |
| 6  | HOMO-4→LUMO(90)                              | 3.4119                 | 363.3875        |                    | 0.0064        |
| 7  | HOMO-5→LUMO(54)                              | 3.5335                 | 350.8821        |                    | 0.0015        |
|    | HOMO-1→LUMO+1(32)                            |                        |                 |                    |               |
| 8  | HOMO-5→LUMO(17)                              | 3.5665                 | 347.6354        |                    | 0.0017        |
|    | HOMO-1→LUMO+1(43)                            |                        |                 |                    |               |
|    | HOMO→LUMO+2(23)                              |                        |                 |                    |               |
| 9  | HOMO-6→LUMO (80)                             | 3.5853                 | 345.8126        |                    | 0.0044        |
|    | HOMO→LUMO+2(16)                              |                        |                 |                    |               |
| 10 | HOMO-7→LUMO(20)                              | 3.6337                 | 341.2064        | 315 <sup>[b]</sup> | 0.0065        |
|    | HOMO-1→LUMO+1(13)                            |                        |                 |                    |               |
|    | HOMO→LUMO+2(50)                              |                        |                 |                    |               |

<sup>[a]</sup>components with greater than 10% contribution shown, <sup>[b]</sup>shoulder peak



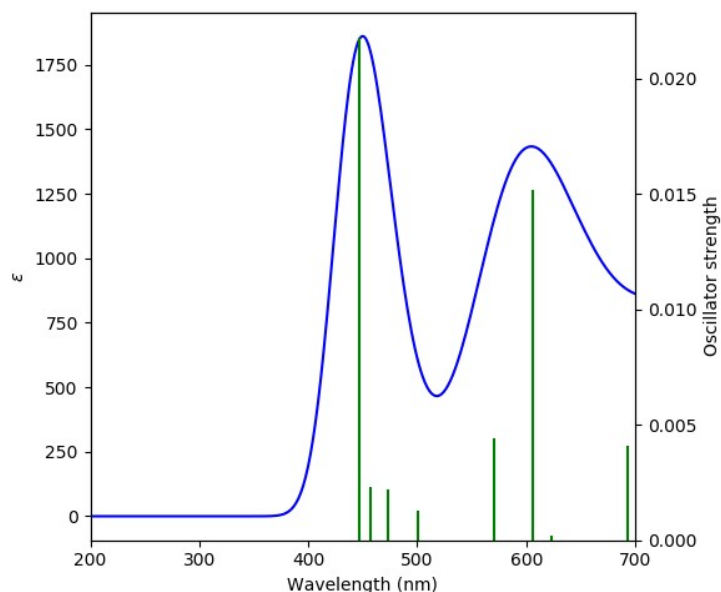

**Fig. S42.** Calculated absorption spectrum of **3** using TD-BP86/def2-svp level of theory.

**Table S5.** TD-DFT calculated electronic transition configuration for **3** along with their corresponding excitation energies, wavelength and oscillator strengths

HOMO is 75

| No | Transition configurations (%) <sup>[a]</sup>                             | Excitation Energy (ev) | Wavelength (nm) |                    | Osc, Strength |
|----|--------------------------------------------------------------------------|------------------------|-----------------|--------------------|---------------|
|    |                                                                          |                        | Cal.            | Expt.              |               |
| 1  | HOMO-2→LUMO(15)<br>HOMO-1→LUMO(84)                                       | 1.5660                 | 791.7253        |                    | 0.0097        |
| 2  | HOMO-3→LUMO(38)<br>HOMO-2→LUMO(54)                                       | 1.7891                 | 692.9975        |                    | 0.0041        |
| 3  | HOMO-4→LUMO(88)                                                          | 1.9909                 | 622.7544        |                    | 0.0002        |
| 4  | HOMO-5→LUMO(19)<br>HOMO-4→LUMO(11)<br>HOMO-3→LUMO(45)<br>HOMO-2→LUMO(18) | 2.0443                 | 606.4872        |                    | 0.0152        |
| 5  | HOMO-5→LUMO(78)                                                          | 2.1738                 | 570.3569        | 524                | 0.0044        |
| 6  | HOMO-6→LUMO(99)                                                          | 2.4785                 | 500.2388        |                    | 0.0013        |
| 7  | HOMO→LUMO+1(94)                                                          | 2.6183                 | 473.5293        |                    | 0.0022        |
| 8  | HOMO-8→LUMO(39)<br>HOMO-7→LUMO(59)                                       | 2.7156                 | 456.5627        |                    | 0.0023        |
| 9  | HOMO-8→LUMO(39)<br>HOMO-7→LUMO(38)                                       | 2.7730                 | 447.1121        | 386 <sup>[b]</sup> | 0.0218        |

<sup>[a]</sup>components with greater than 10% contribution shown, <sup>[b]</sup>shoulder peak



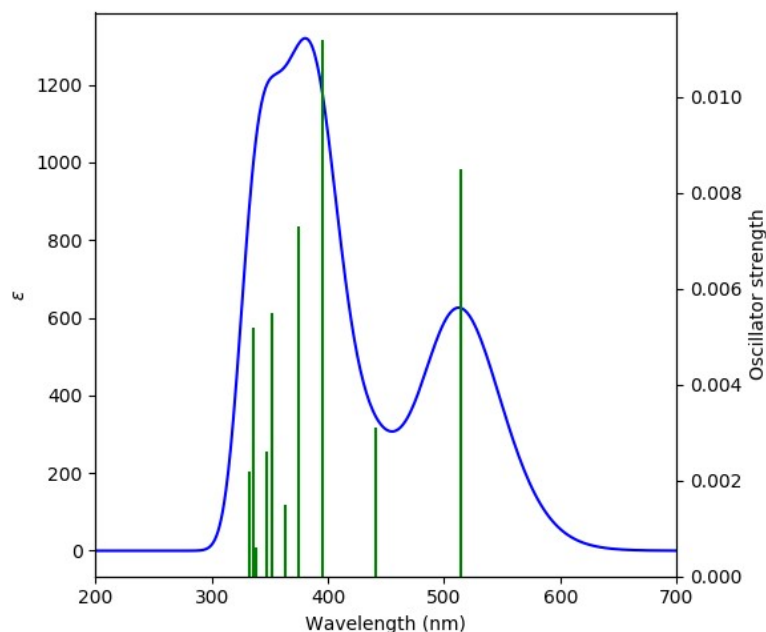

**Fig. S43.** Calculated absorption spectrum of **4** using TD-BP86/def2-svp level of theory.

**Table S6.** TD-DFT calculated electronic transition configuration for **4** along with their corresponding excitation energies, wavelength and oscillator strengths

HOMO is 78

| No | Transition configurations (%) <sup>[a]</sup> | Excitation Energy (ev) | Wavelength (nm) |                    | Osc, Strength |
|----|----------------------------------------------|------------------------|-----------------|--------------------|---------------|
|    |                                              |                        | Cal.            | Expt.              |               |
| 1  | HOMO→LUMO(98)                                | 2.4127                 | 513.8815        | 514                | 0.0085        |
| 2  | HOMO→LUMO+1(99)                              | 2.8108                 | 441.0993        |                    | 0.0031        |
| 3  | HOMO-1→LUMO(89)                              | 3.1408                 | 394.7535        | 394 <sup>[b]</sup> | 0.0112        |
| 4  | HOMO-2→LUMO(89)                              | 3.3095                 | 374.6311        | 375 <sup>[b]</sup> | 0.0073        |
| 5  | HOMO→LUMO+2(98)                              | 3.4140                 | 363.1640        |                    | 0.0015        |
| 6  | HOMO-2→LUMO+1(14)<br>HOMO-1→LUMO+1(80)       | 3.5263                 | 351.5985        |                    | 0.0055        |
| 7  | HOMO-3→LUMO(95)                              | 3.5756                 | 346.7507        |                    | 0.0026        |
| 8  | HOMO-4→LUMO(33)<br>HOMO→LUMO+3(65)           | 3.6640                 | 338.3848        |                    | 0.0006        |
| 9  | HOMO-4→LUMO(59)<br>HOMO→LUMO+3(31)           | 3.6957                 | 335.4822        |                    | 0.0052        |
| 10 | HOMO-5→LUMO(61)<br>HOMO-2→LUMO+1(31)         | 3.7330                 | 332.1301        |                    | 0.0022        |

<sup>[a]</sup>components with greater than 10% contribution shown, <sup>[b]</sup>shoulder peak

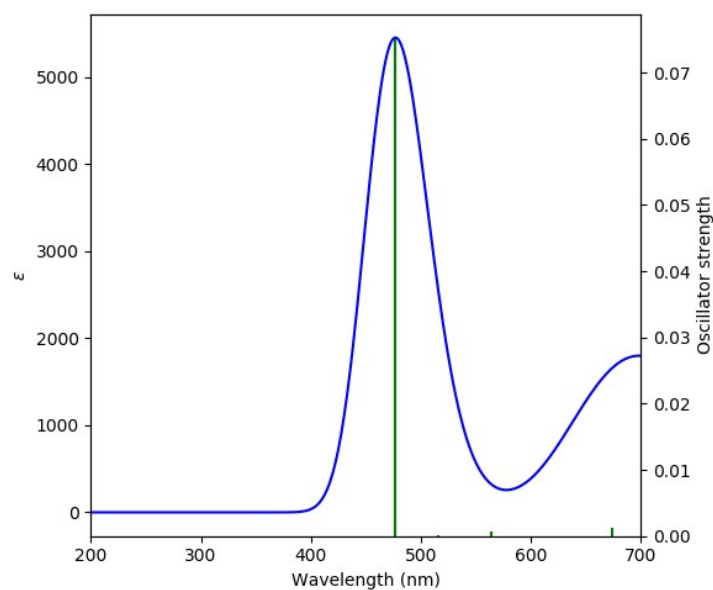

**Fig. S44.** Calculated absorption spectrum of **5** using TD-BP86/def2-svp level of theory.

**Table S7.** TD-DFT calculated electronic transition configuration for **5** along with their corresponding excitation energies, wavelength and oscillator strengths

HOMO is 81

| No | Transition configurations (%) <sup>[a]</sup> | Excitation Energy (ev) | Wavelength (nm) |       | Osc, Strength |
|----|----------------------------------------------|------------------------|-----------------|-------|---------------|
|    |                                              |                        | Cal.            | Expt. |               |
| 1  | HOMO-2→LUMO(88)                              | 1.7709                 | 700.1196        |       | 0.0237        |
| 2  | HOMO-3→LUMO(99)                              | 1.8396                 | 673.9736        |       | 0.0012        |
| 3  | HOMO-5→LUMO(100)                             | 1.9916                 | 622.5356        |       | 0.0           |
| 4  | HOMO-4→LUMO(82)                              | 2.1972                 | 564.2826        |       | 0.0007        |
| 5  | HOMO-6→LUMO(96)                              | 2.4039                 | 515.7626        |       | 0.0002        |
| 6  | HOMO-7→LUMO(93)                              | 2.4074                 | 515.0128        |       | 0.0           |
| 7  | HOMO-8→LUMO(92)                              | 2.5991                 | 477.0274        | 448   | 0.0751        |
| 8  | HOMO-11→LUMO(97)                             | 2.6447                 | 468.8024        |       | 0.0           |

<sup>[a]</sup>components with greater than 10% contribution shown

### III Cartesian Coordinates of all Optimized Structures

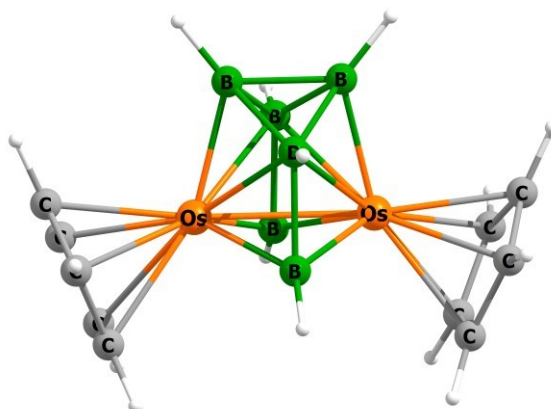

**Figure S45.** Optimized geometry of **1**.

Total energy = -772.09514246 a.u.

Cartesian coordinates for the calculated structure **1** (in Å)

|    |                 |                 |                 |   |                 |                 |                 |
|----|-----------------|-----------------|-----------------|---|-----------------|-----------------|-----------------|
| Os | 1.378818000000  | 0.100903000000  | -0.000267000000 | H | -1.624418000000 | 3.146153000000  | 0.001862000000  |
| Os | -1.378938000000 | 0.101165000000  | -0.000113000000 | B | -0.000057000000 | -0.434671000000 | 1.474265000000  |
| C  | -3.298763000000 | -0.420774000000 | 1.161105000000  | B | 0.000129000000  | 1.362285000000  | 1.280396000000  |
| C  | -3.642335000000 | 0.360621000000  | 0.000748000000  | H | 0.000397000000  | 1.568227000000  | 2.483111000000  |
| C  | -3.299555000000 | -0.419943000000 | -1.160484000000 | B | -0.000160000000 | -0.432799000000 | -1.475365000000 |
| C  | -2.763569000000 | -1.681001000000 | -0.715725000000 | H | -0.000361000000 | -1.101445000000 | -2.485327000000 |
| C  | -2.763073000000 | -1.681518000000 | 0.715001000000  | H | -0.000010000000 | -1.104669000000 | 2.483313000000  |
| C  | 3.299920000000  | -0.419260000000 | -1.160210000000 | H | 2.418703000000  | -2.497705000000 | 1.360850000000  |
| C  | 3.642045000000  | 0.361235000000  | 0.001232000000  | H | 3.427228000000  | -0.110447000000 | 2.205964000000  |
| C  | 3.298590000000  | -0.420565000000 | 1.161369000000  | H | 4.098185000000  | 1.358416000000  | 0.002020000000  |
| C  | 2.763597000000  | -1.681445000000 | 0.714902000000  | H | 3.429890000000  | -0.107889000000 | -2.204269000000 |
| C  | 2.764427000000  | -1.680652000000 | -0.715813000000 | H | 2.420349000000  | -2.496221000000 | -1.363068000000 |
| B  | 0.872742000000  | 2.193100000000  | 0.001059000000  | H | -2.418134000000 | -2.497529000000 | 1.361235000000  |
| H  | 1.624878000000  | 3.145736000000  | 0.001615000000  | H | -3.427885000000 | -0.110482000000 | 2.205589000000  |
| B  | -0.000055000000 | 1.363949000000  | -1.279366000000 | H | -4.099015000000 | 1.357557000000  | 0.001235000000  |
| H  | 0.000139000000  | 1.572783000000  | -2.481546000000 | H | -3.429460000000 | -0.108943000000 | -2.204660000000 |
| B  | -0.872614000000 | 2.193259000000  | 0.001202000000  | H | -2.419002000000 | -2.496535000000 | -1.362762000000 |

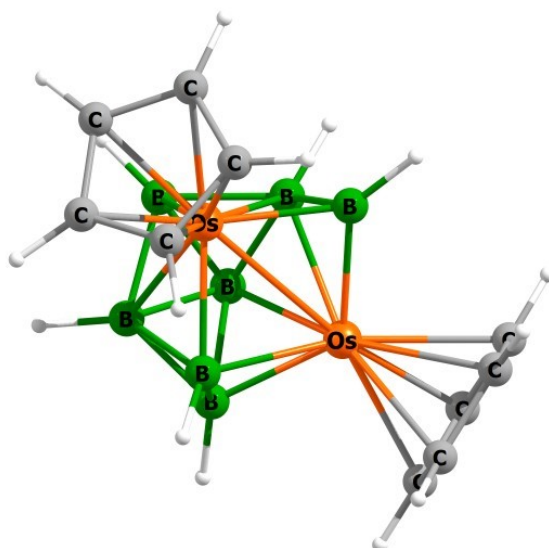

**Figure S46.** Optimized geometry of **2**.

Total energy = -746.67633018 a.u.

Cartesian coordinates for the calculated structure **2** (in Å)

|   |                 |                 |                 |    |                 |                 |                 |
|---|-----------------|-----------------|-----------------|----|-----------------|-----------------|-----------------|
| B | 0.120915000000  | 0.514849000000  | 1.531500000000  | C  | 2.629309000000  | -1.978469000000 | -0.013316000000 |
| H | 0.192226000000  | 0.152829000000  | 2.690751000000  | C  | -2.783636000000 | -1.379690000000 | 1.195228000000  |
| B | -1.005539000000 | 1.822816000000  | 1.103076000000  | C  | -3.441177000000 | -0.107984000000 | 1.018285000000  |
| H | -1.788745000000 | 2.450046000000  | 1.783064000000  | C  | -3.685321000000 | 0.088006000000  | -0.391482000000 |
| B | -0.655246000000 | 2.159817000000  | -0.632446000000 | C  | -3.180010000000 | -1.067923000000 | -1.078327000000 |
| H | -1.314838000000 | 3.099995000000  | -1.035181000000 | C  | -2.623580000000 | -1.966790000000 | -0.101733000000 |
| B | -0.081927000000 | 0.817748000000  | -1.603267000000 | Os | 1.420759000000  | 0.063944000000  | -0.067863000000 |
| H | -0.118414000000 | 0.675031000000  | -2.815117000000 | Os | -1.428109000000 | 0.070731000000  | -0.024368000000 |
| B | -0.000542000000 | -0.935529000000 | -1.186677000000 | H  | 2.342851000000  | -1.815629000000 | 2.223735000000  |
| H | -0.026526000000 | -1.901285000000 | -1.916700000000 | H  | 3.581661000000  | 0.593728000000  | 1.957037000000  |
| B | 1.100245000000  | 1.952785000000  | -0.922315000000 | H  | 4.242359000000  | 0.931863000000  | -0.671552000000 |
| H | 1.849843000000  | 2.736571000000  | -1.462830000000 | H  | 3.334558000000  | -1.251923000000 | -2.039249000000 |
| B | 0.651689000000  | 2.091943000000  | 0.798485000000  | H  | 2.186009000000  | -2.953718000000 | -0.248459000000 |
| H | 1.374052000000  | 2.934907000000  | 1.301566000000  | H  | -2.474192000000 | -1.821952000000 | 2.149778000000  |
| C | 3.244501000000  | -1.083167000000 | -0.958677000000 | H  | -2.161845000000 | -2.939093000000 | -0.312414000000 |
| C | 3.709460000000  | 0.074074000000  | -0.244546000000 | H  | -3.201716000000 | -1.230073000000 | -2.163373000000 |
| C | 3.375944000000  | -0.116200000000 | 1.145930000000  | H  | -4.192450000000 | 0.946286000000  | -0.848885000000 |
| C | 2.721969000000  | -1.387459000000 | 1.288206000000  | H  | -3.718891000000 | 0.588622000000  | 1.818224000000  |

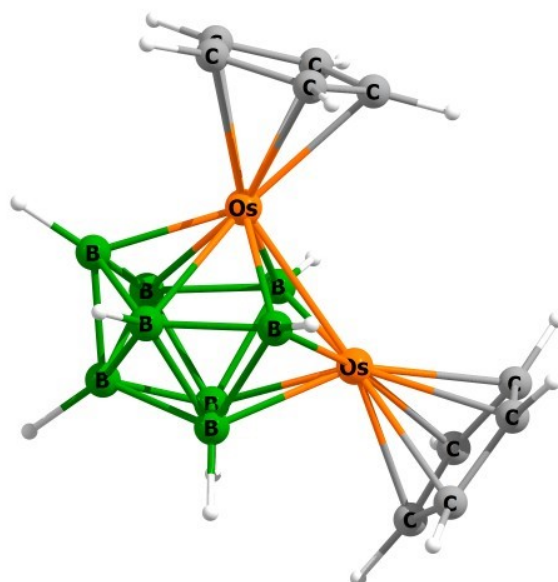

**Figure S47.** Optimized geometry of **3**.

Total energy = -772.09514246 a.u.

Cartesian coordinates for the calculated structure **3** (in Å)

|    |                 |                 |                 |   |                 |                 |                 |
|----|-----------------|-----------------|-----------------|---|-----------------|-----------------|-----------------|
| Os | 1.285832000000  | -0.095847000000 | -0.074398000000 | H | -1.506415000000 | 2.338358000000  | -2.316075000000 |
| Os | -1.340053000000 | 0.033734000000  | -0.001747000000 | B | 0.861937000000  | 1.840993000000  | 0.990839000000  |
| C  | -2.438329000000 | -1.623696000000 | -1.189762000000 | H | 1.776085000000  | 2.352362000000  | 1.605217000000  |
| C  | -3.416252000000 | -0.720097000000 | -0.635035000000 | B | 0.843128000000  | 1.938212000000  | -0.909554000000 |
| C  | -3.328383000000 | -0.805806000000 | 0.797468000000  | H | 1.736989000000  | 2.545196000000  | -1.466038000000 |
| C  | -2.305403000000 | -1.767472000000 | 1.129657000000  | B | 0.072831000000  | 0.262984000000  | 1.624758000000  |
| C  | -1.766691000000 | -2.278348000000 | -0.099174000000 | H | 0.157913000000  | -0.299574000000 | 2.697882000000  |
| C  | 3.156376000000  | -0.590992000000 | 1.304198000000  | B | 0.034505000000  | 0.484300000000  | -1.665379000000 |
| C  | 2.743067000000  | -1.778208000000 | 0.642250000000  | H | 0.079646000000  | 0.005048000000  | -2.783871000000 |
| C  | 2.887494000000  | -1.560495000000 | -0.794750000000 | H | -0.974713000000 | -3.030669000000 | -0.192400000000 |
| C  | 3.408914000000  | -0.245096000000 | -1.000454000000 | H | -2.001155000000 | -2.061191000000 | 2.140984000000  |
| C  | 3.518457000000  | 0.377503000000  | 0.293857000000  | H | -2.242299000000 | -1.782450000000 | -2.257351000000 |
| B  | -1.876162000000 | 2.073687000000  | 0.105536000000  | H | -3.930156000000 | -0.233961000000 | 1.514565000000  |
| H  | -2.980493000000 | 2.572247000000  | 0.140762000000  | H | -4.099651000000 | -0.079073000000 | -1.205038000000 |
| B  | -0.330366000000 | 2.877186000000  | 0.120065000000  | H | 2.380112000000  | -2.695822000000 | 1.122456000000  |
| H  | -0.249424000000 | 4.086748000000  | 0.181475000000  | H | 3.144030000000  | -0.411901000000 | 2.385951000000  |
| B  | -0.842916000000 | 1.787893000000  | 1.494275000000  | H | 3.857670000000  | 1.402722000000  | 0.482709000000  |
| H  | -1.403941000000 | 2.065215000000  | 2.535486000000  | H | 3.631043000000  | 0.226948000000  | -1.964794000000 |
| B  | -0.895020000000 | 1.928038000000  | -1.349220000000 | H | 2.650366000000  | -2.289802000000 | -1.580998000000 |

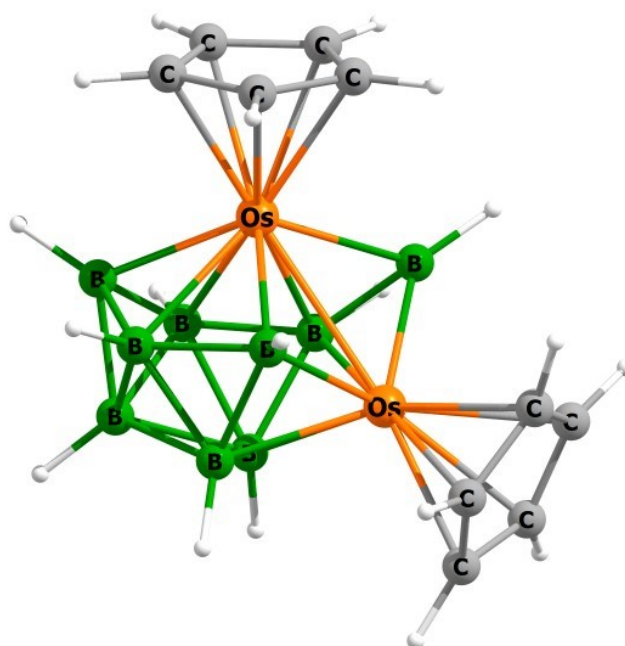

**Figure S48.** Optimized geometry of **4**.

Total energy = -797.57996987 a.u.

Cartesian coordinates for the calculated structure **4** (in Å)

|    |                 |                 |                 |   |                 |                 |                 |
|----|-----------------|-----------------|-----------------|---|-----------------|-----------------|-----------------|
| Os | 1.407441000000  | -0.038249000000 | -0.052697000000 | B | -0.873188000000 | 2.076284000000  | -0.829076000000 |
| Os | -1.450091000000 | 0.015056000000  | -0.071903000000 | H | -1.664263000000 | 2.781861000000  | -1.422047000000 |
| C  | 3.565797000000  | -0.646178000000 | -0.571301000000 | B | 0.417667000000  | 2.930064000000  | 0.142945000000  |
| C  | 2.718293000000  | -1.748718000000 | -0.917464000000 | H | 0.380040000000  | 4.137923000000  | 0.254282000000  |
| C  | 2.092500000000  | -2.231554000000 | 0.295275000000  | B | -0.110178000000 | 0.318519000000  | 1.537100000000  |
| C  | 2.550769000000  | -1.427417000000 | 1.387001000000  | H | -0.207057000000 | -0.233940000000 | 2.615765000000  |
| C  | 3.450317000000  | -0.434826000000 | 0.850685000000  | B | -0.093120000000 | 0.707446000000  | -1.568985000000 |
| C  | -2.618098000000 | -1.851271000000 | 0.746389000000  | H | -0.071938000000 | 0.008075000000  | -2.636370000000 |
| C  | -3.075760000000 | -0.678075000000 | 1.432382000000  | B | -0.129642000000 | -0.941353000000 | -1.428949000000 |
| C  | -3.662087000000 | 0.211935000000  | 0.462840000000  | H | -0.119861000000 | -1.997996000000 | -2.013270000000 |
| C  | -3.586819000000 | -0.421843000000 | -0.826975000000 | H | 2.266207000000  | -1.538327000000 | 2.440057000000  |
| C  | -2.933282000000 | -1.690907000000 | -0.649264000000 | H | 3.973955000000  | 0.336251000000  | 1.428216000000  |
| B  | 0.967067000000  | 1.986292000000  | -1.324834000000 | H | 4.186957000000  | -0.059980000000 | -1.259899000000 |
| H  | 1.546677000000  | 2.353886000000  | -2.329476000000 | H | 2.600609000000  | -2.179079000000 | -1.919225000000 |
| B  | 1.944192000000  | 2.098390000000  | 0.105105000000  | H | 1.391239000000  | -3.072123000000 | 0.367084000000  |
| H  | 3.074279000000  | 2.531342000000  | 0.155194000000  | H | -2.131882000000 | -2.719037000000 | 1.207749000000  |
| B  | 0.897857000000  | 1.755253000000  | 1.430089000000  | H | -2.980562000000 | -0.480672000000 | 2.506969000000  |
| H  | 1.455929000000  | 1.946398000000  | 2.494382000000  | H | -4.095310000000 | 1.197938000000  | 0.670850000000  |
| B  | -0.823745000000 | 1.912584000000  | 0.977549000000  | H | -3.961435000000 | -0.006614000000 | -1.770964000000 |
| H  | -1.659201000000 | 2.477338000000  | 1.658407000000  | H | -2.737334000000 | -2.424813000000 | -1.440205000000 |

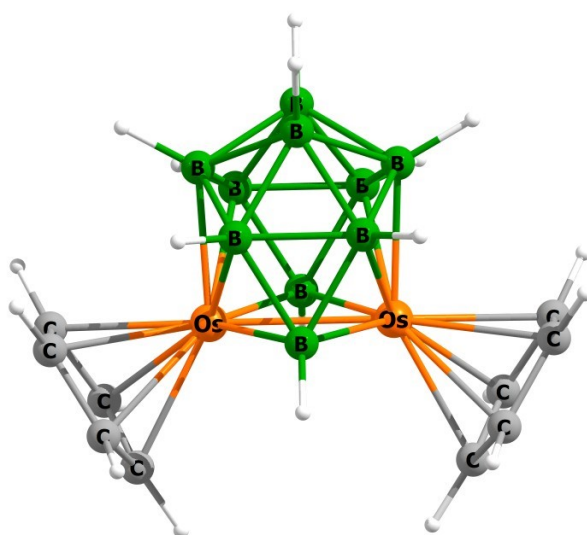

**Figure S49.** Optimized geometry of **5**.

Total energy = -823.02997392 a.u.

Cartesian coordinates for the calculated structure **3** (in Å)

|   |                 |                 |                 |    |                 |                 |                 |
|---|-----------------|-----------------|-----------------|----|-----------------|-----------------|-----------------|
| C | -2.805886000000 | -1.446942000000 | 1.168283000000  | H  | 1.691795000000  | 1.619274000000  | -2.545361000000 |
| C | -2.356473000000 | -2.165908000000 | 0.003978000000  | B  | 0.001570000000  | 2.813832000000  | -0.898990000000 |
| C | -2.802174000000 | -1.452997000000 | -1.165614000000 | H  | 0.003070000000  | 3.890297000000  | -1.457165000000 |
| C | -3.529620000000 | -0.296376000000 | -0.720342000000 | B  | -0.894675000000 | 1.462987000000  | 1.641215000000  |
| C | -3.531777000000 | -0.292560000000 | 0.714696000000  | H  | -1.690699000000 | 1.621188000000  | 2.545524000000  |
| C | 2.359376000000  | -2.164586000000 | 0.005513000000  | B  | -0.000796000000 | -0.058470000000 | 1.716888000000  |
| C | 2.809231000000  | -1.443968000000 | 1.168732000000  | H  | -0.001134000000 | -0.851073000000 | 2.637671000000  |
| C | 3.532683000000  | -0.289073000000 | 0.713084000000  | B  | 0.895133000000  | 1.461856000000  | 1.641637000000  |
| C | 3.529153000000  | -0.294444000000 | -0.721977000000 | H  | 1.691420000000  | 1.618447000000  | 2.545981000000  |
| C | 2.803281000000  | -1.452550000000 | -1.165424000000 | Os | -1.296389000000 | -0.111092000000 | -0.000212000000 |
| B | -0.000466000000 | -0.058068000000 | -1.717105000000 | Os | 1.295188000000  | -0.113273000000 | 0.000060000000  |
| H | -0.000839000000 | -0.850244000000 | -2.638233000000 | H  | 3.972503000000  | 0.471361000000  | -1.369254000000 |
| B | -0.894391000000 | 1.463359000000  | -1.641160000000 | H  | 2.616625000000  | -1.738634000000 | -2.207033000000 |
| H | -1.689999000000 | 1.621830000000  | -2.545779000000 | H  | 1.764480000000  | -3.087002000000 | 0.010531000000  |
| B | -1.399211000000 | 2.123981000000  | 0.000063000000  | H  | 2.627564000000  | -1.722180000000 | 2.213358000000  |
| H | -2.455886000000 | 2.726746000000  | -0.000017000000 | H  | 3.979357000000  | 0.481491000000  | 1.352374000000  |
| B | 0.001342000000  | 2.813642000000  | 0.899575000000  | H  | -1.760550000000 | -3.087633000000 | 0.007420000000  |
| H | 0.002645000000  | 3.890022000000  | 1.457921000000  | H  | -2.622863000000 | -1.725973000000 | 2.212450000000  |
| B | 1.401489000000  | 2.122433000000  | 0.000473000000  | H  | -3.979300000000 | 0.476355000000  | 1.355385000000  |
| H | 2.458985000000  | 2.723538000000  | 0.000639000000  | H  | -3.974786000000 | 0.469339000000  | -1.366495000000 |
| B | 0.895629000000  | 1.462159000000  | -1.641014000000 | H  | -2.615978000000 | -1.737558000000 | -2.207724000000 |

## IV References

- 1 (a) C. L. Gross, S. R. Wilson and G. S. Girolami, *J. Am. Chem. Soc.*, 1994, **116**, 10294; (b) M. I. Bruce, K. Costuas, T. Davin, J.-F. Halet, K. A. Kramarczuk, P. J. Low, B. K. Nicholson, G. J. Perkins, R. L. Roberts, B. W. Skelton, M. E. Smith and A. H. White, *Dalton Trans.*, 2007, 5387.
- 2 (a) J. J. Led and H. Gesmar, *Chem. Rev.*, 1991, **91**, 1413–1426; (b) L. Yang, R. Simionescu, A. Lough and H. Yan, *Dyes Pigm.*, 2011, **91**, 264–267; (c) R. Weiss and R. N. Grimes, *J. Am. Chem. Soc.*, 1978, **100**, 1401–1405.
- 3 (a) G. M. Sheldrick, *Acta Crystallogr., Sect. A: Found. Adv.*, 2015, **A71**, 3–8; (b) G. M. Sheldrick, *SHELXL97*; University of Gottingen: Germany, 1997.
- 4 G. M. Sheldrick, *Acta Crystallogr., Sect. C: Struct. Chem.* 2015, **C71**, 3 – 8.
- 5 O. V. Dolomanov, L. J. Bourhis, R. J. Gildea, J. A. K. Howard and H. Puschmann, *J. Appl. Crystallogr.*, 2009, **42**, 339–341.
- 6 M. J. Frisch, G. W. Trucks, H. B. Schlegel, G. E. Scuseria, M. A. Robb, J. R. Cheeseman, G. Scalmani, V. Barone, B. Mennucci, G. A. Petersson, H. Nakatsuji, M. Caricato, X. Li, H. P. Hratchian, A. F. Izmaylov, J. Bloino, G. Zheng, J. L. Sonnenberg, M. Hada, M. Ehara, K. Toyota, R. Fukuda, J. Hasegawa, M. Ishida, T. Nakajima, Y. Honda, O. Kitao, H. Nakai, T. Vreven, J. A. Montgomery Jr., J. E. Peralta, F. Ogliaro, M. Bearpark, J. J. Heyd, E. Brothers, K. N. Kudin, V. N. Staroverov, R. Kobayashi, J. Normand, K. Raghavachari, A. Rendell, J. C. Burant, S. S. Iyengar, J. Tomasi, M. Cossi, N. Rega, J. M. Millam, M. Klene, J. E. Knox, J. B. Cross, V. Bakken, C. Adamo, J. Jaramillo, R. Gomperts, R. E. Stratmann, O. Yazyev, A. J. Austin, R. Cammi, C. Pomelli, J. W. Ochterski, R. L. Martin, K. Morokuma, V. G. Zakrzewski, G. A. Voth, P. Salvador, J. J. Dannenberg, S. Dapprich, A. D. Daniels, Ö. Farkas, J. B. Foresman, J. V. Ortiz, J. Cioslowski, D. J. Fox, *Gaussian 09, Revision C.01*, Gaussian, Inc., Wallingford, CT, 2010.
- 7 (a) H. L. Schmider, A. D. Becke, *J. Chem. Phys.*, 1998, **108**, 9624–9631; (b) J. P. Perdew, *Phys. Rev. B* 1986, **33**, 8822–8824.
- 8 EMSL Basis Set Exchange Library. <https://bse.pnl.gov/bse/portal>
- 9 (a) E. D. Glendening, A. E. Reed, J. E. Carpenter and F. Weinhold, *NBO Program 3.1*, W. T. Madison, 1988; (b) A. E. Reed, F. Weinhold and L. A. Curtiss, *Chem. Rev.*, 1988, **88**, 899–926; (c) F. Weinhold and R. Landis, *Valency and bonding: A natural bond orbital donor-acceptor perspective*; Cambridge University Press: Cambridge, U.K, 2005.
- 10 K. Wiberg, *Tetrahedron*, 1968, **24**, 1083–1096.
- 11 I. I. Dennington, R. T. Keith, J. Millam, K. Eppinnett, W. L. Hovell and R. Gilliland, *GaussView, Version 3.09*; Semichem Inc.: Shawnee Mission, KS, 2003.
- 12 G. A. Zhurko, <http://www.chemcraftprog.com>
